# Sir3 Heterochromatin Protein Promotes NHEJ by Direct Inhibition of Sae2

Hélène Bordelet<sup>1,2</sup>, Rafaël Costa<sup>1</sup>, Clémentine Brocas<sup>1</sup>, Jordane Depagne<sup>3</sup>, Xavier Veaute<sup>3</sup>, Didier Busso<sup>3</sup>, Amandine Batté<sup>1,4</sup>, Raphaël Guérois<sup>5</sup>, Stéphane Marcand<sup>1</sup> and Karine Dubrana<sup>1\*</sup>

1. Université de Paris and Université Paris-Saclay, INSERM, iRCM/IBFJ CEA, UMR Stabilité Génétique Cellules Souches et Radiations, F-92265, Fontenay-aux-Roses, France.

2. Régulation spatiale des génomes, Institut Pasteur, CNRS UMR3525, 75015 Paris, France

3. CIGEx platform. Université de Paris and Université Paris-Saclay, INSERM, iRCM/IBFJ CEA, UMR Stabilité Génétique Cellules Souches et Radiations, F-92265, Fontenay-aux-Roses, France.

4. Center for Integrative Genomics, Bâtiment Génopode, University of Lausanne, Lausanne, Switzerland.

5. Institute for Integrative Biology of the Cell (I2BC), CEA, CNRS, Université Paris-Sud, Université Paris-Saclay, Gif-sur-Yvette, France

\* Corresponding author: [karine.dubrana@cea.fr](mailto:karine.dubrana@cea.fr)

1 **Abstract**

2 Heterochromatin is a conserved feature of eukaryotic chromosomes, with  
3 central roles in gene expression regulation and maintenance of genome stability. How  
4 DNA repair occurs in heterochromatin remains poorly described. In *Saccharomyces*  
5 *cerevisiae*, the Silent Information Regulator (SIR) complex assembles  
6 heterochromatin-like chromatin at subtelomeres. SIR-mediated repressive chromatin  
7 limits double strand break (DSB) resection protecting damaged chromosome ends  
8 during HR. As resection initiation marks the cross-road between repair by non-  
9 homologous end joining (NHEJ) or HR, we asked whether SIR-mediated  
10 heterochromatin regulates NHEJ. We show that SIRs promotes NHEJ through two  
11 pathways, one depending on repressive chromatin assembly, and the other relying on  
12 Sir3 in a manner that is independent of its heterochromatin-promoting function. Sir3 is  
13 a potent inhibitor of Sae2-dependent MRX functions. Sir3 physically interacts with  
14 Sae2 and this interaction impairs Sae2 interaction with MRX. As a consequence, Sir3  
15 limits Mre11-mediated resection, delays MRX removal from DSB ends and promotes  
16 NHEJ.

1 **Main Text:**

2 **Introduction**

3  
4 DNA double strand breaks (DSBs) are genotoxic lesions typically repaired by two  
5 conserved repair pathways: Non-Homologous End Joining (NHEJ) and Homologous  
6 Recombination (HR). NHEJ ligates DSB ends with minimal or no processing, and acts  
7 throughout the cell cycle. Repair by HR requires a homologous template for repair, the  
8 resection of the DSB ends, and occurs in S and G2 phases. Initiation of DSB resection thus  
9 represents a decision point between NHEJ and HR, upon which various cellular inputs  
10 converge.

11 DSB ends are rapidly bound by the Ku70/80 and Mre11-Rad50-Xrs2<sup>NBS1</sup> (MRX<sup>MRN</sup>) end  
12 binding complexes. In *S. cerevisiae*, both complexes aid recruitment of the NHEJ ligation  
13 complex composed of the yeast DNA ligase IV Dnl4 (Lig4) and its XRCC4/XLF-like regulatory  
14 subunits Lif1 and Nej1 (Chen and Tomkinson, 2011; Mahaney et al., 2014; Matsuzaki et al.,  
15 2008; Palmbo et al., 2005, 2008).

16 In addition to its function in NHEJ, the MRX<sup>MRN</sup> complex is key to shifting repair towards  
17 HR when stimulated to initiate resection by Sae2. Indeed, Sae2 activates the endonuclease  
18 activity of MRX<sup>MRN</sup>, which cleaves the 5' strand of the DSB end (Bazzano et al., 2021; Cannavo  
19 and Cejka, 2014). This provides an entry point for MRX 3'-5' exonuclease activity, which  
20 degrades the DNA towards the DSB, creating a short ssDNA extensions that can no longer be  
21 ligated by the canonical NHEJ machinery (Cannavo and Cejka, 2014; Garcia et al., 2011;  
22 Mimitou and Symington, 2008). Impairment of Sae2-MRX dependent resection increases  
23 error-prone NHEJ, highlighting the role of Sae2 in coordinating DSB repair pathway choice  
24 (Huertas et al., 2008; Lee and Lee, 2007).

25 As a key determinant of NHEJ/HR repair balance, Sae2 activity and protein levels are  
26 tightly regulated. Sae2 activity is cell cycle regulated and restricted to S-G2 by CDK-dependent  
27 phosphorylation (Huertas et al., 2008). Upon DNA damage, the Tel1 and Mec1 checkpoint  
28 kinases phosphorylate Sae2, altering its oligomerization state and forming units active for  
29 repair (Baroni et al., 2004; Fu et al., 2014). Sae2 is also negatively regulated by acetylation,  
30 which favours its degradation by autophagy thus preventing the persistence of active Sae2 in  
31 the cell (Fu et al., 2014; Robert et al., 2011).

32 In cells, DSB repair does not occur on naked DNA, but in the context of chromatin,  
33 which modulates repair efficiency and outcome in several organisms (Batté et al., 2017; Chiolo  
34 et al., 2011; Goodarzi et al., 2008; Lemaître et al., 2014; Tsouroula et al., 2016). In *S.*  
35 *cerevisiae* haploid cells, heterochromatin-like chromatin (also called silent chromatin)  
36 establishes at the two cryptic mating type loci (*HM* loci) and at each of the 32 subtelomeric  
37 loci. Its core components are histone H4 lysine 16 deacetylated nucleosomes, which are

38 bridged by the histone-binding factor Sir3 in complex with the protein Sir4 and the histone  
39 deacetylase Sir2 (Behrouzi et al., 2016; Faure et al., 2019; Gartenberg and Smith, 2016). Sir2  
40 deacetylates histone H4 lysine 16 thus promoting Sir3 binding and propagation along  
41 chromatin. The limiting factor of this propagation is Sir3, and its overexpression is sufficient to  
42 increase silent chromatin spreading and transcriptional repression in subtelomeric regions,  
43 providing an ideal genetic tool to modulate silent chromatin at given sites (Hecht et al., 1996;  
44 Katan-Khaykovich and Struhl, 2005; Renauld et al., 1993; Strahl-Bolsinger et al., 1997). Sir3  
45 can be seen as the functional ortholog of the heterochromatin factor HP1 that binds histones  
46 H3 methylated on lysine 9 in other eukaryotes (Allshire and Madhani, 2018; Larson et al., 2017;  
47 Machida et al., 2018; Strom et al., 2017). In addition, general heterochromatin properties are  
48 conserved in budding yeast such as *cis* and *trans* cooperativity in the establishment of  
49 transcription repressive compartments, clustering at the nuclear periphery and near the  
50 nucleolus, epigenetic variegation and late replication initiation (Meister and Taddei, 2013;  
51 Ruault et al., 2021).

52 SIR proteins also contribute to genome stability in several ways. Sir4 inhibits telomere  
53 end fusions by NHEJ (Marcand et al., 2008) and favours telomere elongation through  
54 telomerase recruitment (Chen et al., 2018; Dalby et al., 2013; Hass and Zappulla, 2015).  
55 However, the SIR complex also indirectly promotes NHEJ, as derepression of the *HM* loci in  
56 *sir* mutants and the resulting expression of the  $\alpha$ 1- $\alpha$ 2 repressor inhibits NHEJ through  
57 negative transcriptional regulation of Nej1, and to a lesser extent Lif1 (Aström et al., 1999;  
58 Frank-Vaillant and Marcand, 2001; Kegel et al., 2001; Lee et al., 1999; Valencia et al., 2001).  
59 Finally, we recently showed that SIR-mediated heterochromatin structure protects  
60 subtelomeric DSBs from extensive resection (Batté et al., 2017). Whether SIR proteins also  
61 inhibit resection initiation and as such play a direct NHEJ-promoting role at subtelomeres is  
62 unknown.

63 Here we found that Sir3 promotes NHEJ in *cis* through heterochromatin formation, as  
64 well as in *trans* independently of heterochromatin formation. The *trans* effect relies on a direct  
65 interaction between Sir3 and Sae2 that regulates NHEJ repair. This interaction, between the  
66 Sir3 conserved AAA+ domain and the C-terminal domain of Sae2, inhibits Sae2 functions.  
67 Sae2-Sir3 interaction limits Sae2-MRX dependent resection and favours NHEJ. This function  
68 is separable from Sir3-mediated heterochromatin assembly, revealing a new role for SIRs in  
69 regulating DSB repair. Sir3 does not only promote genome stability as part of heterochromatin,  
70 but is also a direct negative regulator of Sae2, and thus a pro-NHEJ repair factor.

71

## 72 **Results**

### 73 **NHEJ is increased in *cis* and in *trans* by Sir3 overexpression**

74 Yeast heterochromatin (Sir3-mediated silent chromatin) delays DSB resection,  
75 favouring accurate repair by HR near chromosome ends (Batté et al., 2017). Nevertheless,  
76 heterochromatin impact on NHEJ has not been addressed. To explore this issue, we used  
77 erroneous NHEJ repair of an I-SceI-induced DSB as a proxy for NHEJ efficiency. To establish  
78 heterochromatin at the I-SceI site, we exploited the ability of Sir3 overexpression to spread  
79 heterochromatin specifically along subtelomeric regions (Batté et al., 2017). The I-SceI site  
80 inserted at a subtelomere (1.4 kb from *TEL6R*) is embedded in euchromatin in wild-type (WT)  
81 cells but assembled in heterochromatin in cells overexpressing Sir3. Conversely, the I-SceI  
82 site inserted at an intrachromosomal position (*LYS2* locus, 300 kb from the closest telomere)  
83 remains euchromatic in both contexts (Hocher et al., 2018). Continuous I-SceI expression,  
84 driven by a galactose-inducible promoter, is lethal unless NHEJ repairs the DSB with a  
85 sequence change that prevents a new cleavage by I-SceI (Figure 1A). Survival frequency was  
86 around  $10^{-3}$  in WT cells, and was reduced 10-fold in cells lacking Ligase 4 (Dnl4), indicating  
87 that most events leading to survival were products of classical NHEJ (Figure 1B, 1C).

88 Sir3 overexpression led to a 25-fold increase in survival after DSB induction at *TEL6R*  
89 which was mainly Dnl4-dependent (Figure 1B). DNA sequencing of repair junctions confirmed  
90 that Sir3 overexpression led to increased NHEJ in subtelomeres (Figure 1B, S1). This effect  
91 partly relied on heterochromatin formation since in the absence of Sir4, the NHEJ increase  
92 caused by Sir3 overexpression was less pronounced (Figure 1B). However, NHEJ levels in  
93 *sir4*Δ cells overexpressing Sir3 remained 7-fold higher than in WT cells, suggesting that Sir3  
94 overexpression also increased NHEJ independently of heterochromatin formation.  
95 Consistently, Sir3 overexpression increased NHEJ levels at a euchromatic DSB where Sir3  
96 does not bind, although to a more modest extent (Figure 1C). This data suggests that  
97 heterochromatin favours NHEJ repair, and that an excess of Sir3 also stimulates NHEJ in *trans*  
98 independently of heterochromatin assembly.

### 99 **Sir3 overexpression inhibits MRX-Sae2**

100 Increased NHEJ is a typical phenotype of impaired Mre11 nuclease activity as  
101 observed in the *mre11-H125N* nuclease deficient mutant or in absence of its regulator Sae2  
102 (Huertas and Jackson, 2009; Huertas et al., 2008; Lee and Lee, 2007). Consistently, the  
103 absence of *SAE2* and the *mre11-H125N* point mutation led to an epistatic 8-fold increase in  
104 NHEJ at euchromatic *TEL6R* and *LYS2* DSB sites (Figure 1B, 1C). We thus tested if Sir3-  
105 mediated heterochromatin and the *trans* effect of Sir3 overexpression on NHEJ could result  
106 from a defect in Mre11 nuclease activity.

107 At heterochromatic DSB sites, the deletion of *SAE2* in cells overexpressing Sir3 did not  
108 further increase NHEJ, suggesting that MRX-Sae2 is inhibited (Figure 1B). However, *SAE2*  
109 deficiency by itself had a significantly lower effect than Sir3 overexpression, indicating that  
110 heterochromatin favours NHEJ beyond MRX-Sae2 inhibition. At the euchromatic *LYS2* site,  
111 *SAE2* deletion or *mre11-H125N* mutation increased NHEJ in an epistatic manner and to the  
112 same extent as Sir3 overexpression (Figure 1C). NHEJ frequencies were not further increased  
113 in *sae2Δ* cells overexpressing Sir3 suggesting that Sae2 and Mre11 nuclease activity are  
114 inhibited in these cells. Altogether, these results argue that heterochromatin favours NHEJ  
115 repair and that the overexpression of Sir3 inhibits MRX-Sae2 in *trans*.

116 The MRX-Sae2 complex is important to initiate resection of DSB ends (Cannavo and  
117 Cejka, 2014; Garcia et al., 2011; Mimitou and Symington, 2008). To confirm the *trans* inhibition  
118 of MRX-Sae2, we tested if Sir3 overexpression could delay resection at a euchromatic site. To  
119 assess DSB resection, we employed a PCR-based method to evaluate the resection kinetics  
120 at 1 kb from the I-SceI cutting site (Figure 1D; (Batté et al., 2017)). Sir3 overexpression delayed  
121 resection of the euchromatic DSB at early time point after galactose addition, mimicking the  
122 resection delay observed in *sae2Δ* cells (Figure 1E). The resection delays conferred by *SAE2*  
123 deletion and Sir3 overexpression were epistatic (Figure 1E), consistent with an inhibition of the  
124 nuclease activity of the MRX-Sae2 complex upon Sir3 overexpression.

125 Increased persistence of Mre11 at DSB is typically observed when Mre11 nuclease  
126 activity is altered, as seen in *mre11-H125N* mutant or in *SAE2* deficient cells (Cannavo and  
127 Cejka, 2014; Clerici et al., 2006; Lisby and Rothstein, 2004; Yu et al., 2018). In agreement with  
128 an inhibition of MRX-Sae2 by Sir3, cells overexpressing Sir3 accumulated Mre11 foci following  
129 DSB induction (Figure 1F, 1G). The increase in Mre11 foci was comparable to that observed  
130 in *sae2Δ* mutants and was not increased upon additional Sir3 overexpression (Figure 1G).  
131 Thus, overexpression of Sir3 affects Mre11 turnover at euchromatic DSB sites where Sir3 is not  
132 bound, recapitulating another typical phenotype of impaired Mre11 nuclease activity. To conclude,  
133 Sir3 overexpression increases NHEJ at subtelomeric DSBs through at least two pathways.  
134 One that relies on its ability to assemble heterochromatin, and another that limits MRX-Sae2  
135 activity but is independent of heterochromatin formation.

### 136 **Sir3 inhibits Sae2 in a dose dependent manner**

137 To dissect the mechanism underlying the inhibition of MRX-Sae2 following Sir3  
138 overexpression, we tested whether this effect was modulated by Sir3 dosage. Under the  
139 control of the strong *pGPD* promoter Sir3 expression increases 29-fold compared to WT. In  
140 contrast, under the weaker *pADH1* promoter Sir3 expression increases only 9-fold (Hoche et  
141 al., 2018). We observed that lower Sir3 overexpression resulted in a lesser increase in NHEJ,  
142 indicating that Sir3 overexpression impacts NHEJ in a dose dependent manner (Figure 1H).

143           Upon Sir3 overexpression, Mre11 recruitment to DSB was maintained (Figure 1F), but  
144 resection was delayed (Figure 1E), suggesting that Sae2, rather than Mre11, might be the  
145 target of Sir3. If true, Sir3 dependent NHEJ increase should be suppressed by Sae2 co-  
146 overexpression. To perform Sae2 overexpression, we transformed cells with a high-copy  
147 number plasmid bearing the *SAE2* gene under the control of its own promoter. Sae2  
148 overexpression lowers NHEJ levels in *sae2Δ* cells, showing that overexpressed-Sae2 is  
149 functional (Figure 1H). Sae2 overexpression partially suppressed the effect of very high Sir3  
150 levels (*pGPD* promoter, 2 $\mu$  *SAE2*) and completely suppressed the effect of moderately high  
151 Sir3 levels (*pADH1* promoter, 2 $\mu$  *SAE2*) (Figure 1H). Thus, increased Sae2 expression  
152 counteracts the effects of Sir3 overexpression on NHEJ, indicating that Sir3 regulates Sae2  
153 levels or activity.

#### 154 **Sae2 and Sir3 interact *in vivo* and *in vitro***

155           Since Sae2 is limiting for normal resection rate (Robert et al., 2011; Tsabar et al., 2015),  
156 we addressed the possibility that Sir3 overexpression could regulate cellular levels of Sae2.  
157 To do so, GFP fused *SAE2* protein levels were quantified by Western blot in WT or Sir3  
158 overexpressing cells. We observed no major difference in Sae2 protein levels in Sir3  
159 overexpressing cells compared to WT (Figure S2), indicating that Sir3 overexpression did not  
160 impact Sae2 levels.

161           The dose dependent effect of Sir3 on NHEJ, and its suppression upon increasing Sae2  
162 expression, raises the possibility that Sir3 and Sae2 interact. Consistent with this hypothesis,  
163 Sir3 overexpression drastically modified the nuclear distribution of Sae2-GFP. Whereas Sae2-  
164 GFP exhibited a diffused nuclear signal in WT cells (Figure 2A), it accumulated in a single  
165 bright focus upon Sir3 overexpression (Figure 2A). This bright focus resembled the focus  
166 formed by telomeres, Rap1 and SIR proteins in response to Sir3 overexpression (Ruault et al.,  
167 2011). Analysis of the localisation of Sae2-GFP and Sir3-mCherry confirmed that the two  
168 proteins colocalize in a single cluster upon Sir3 overexpression (Figure 2A), suggesting that  
169 they physically interact even in the absence of DSB.

170           Using a chromatin immunoprecipitation (ChIP) approach, we observed Sae2 bound to  
171 chromosome ends in WT cells but not in cells lacking Sir3 (Figure 2B). Overexpression of Sir3  
172 increased Sae2 interaction with telomeres and its spreading along subtelomeres suggesting  
173 that Sir3 interacts with Sae2 on heterochromatin (Figure 2B).

174           Sae2-GFP pull-down of Sir3 was achieved in Sir3 overexpressing cells (Figure 2C),  
175 and to a lesser extent in WT cells (Figure 2D). This further supports a physical interaction  
176 between the two proteins. Furthermore, we observed Sae2-Sir3 interaction using a yeast two-  
177 hybrid assay (Figure 3B-C, S3), in agreement with a previous genome-wide screen (Yu et al.,  
178 2008), and providing further evidence that the two proteins physically interact *in vivo*. To

179 characterize the domains involved in this interaction, we analysed the multiple sequence  
180 alignments of both Sae2 and Sir3 proteins of the *Saccharomycetaceae* family and delineated  
181 conserved subdomains (Figure 3A-C, S3, S4). Yeast two-hybrid assays screening of  
182 conserved subdomains revealed an interaction between the N-terminal part of Sir3 AAA+  
183 domain (Sir3<sup>SaID</sup>; residues 531-723) and the Sae2 C-terminal domain (Sae2<sup>C</sup>, residues 173-  
184 345) (Figure 3A-C, S3, S4). Sir3<sup>SaID</sup> (for Sae2 Interaction Domain), overlaps with the previously  
185 defined Sir4 interacting domain (Figure 3A; (King et al., 2006)). Sir4 was not required for the  
186 observed Sir3-Sae2 two-hybrid interaction (Figure 3D).

187 To verify that the Sir3-Sae2 interaction was direct, we purified histidine-tagged Sae2<sup>C</sup>  
188 and GST-tagged Sir3<sup>SaID</sup> fragments expressed in bacteria (Figure 3E; Figure S5) and  
189 performed pull-down experiments. Sae2<sup>C</sup> was retrieved with purified GST-Sir3<sup>SaID</sup>, but not with  
190 GST alone showing specific direct interaction (Figure 3E). Protein extracts used for this  
191 experiment were supplemented with benzonase to remove DNA, showing that DNA did not  
192 mediate the interaction and that direct protein interaction takes place between Sir3<sup>SaID</sup> and  
193 Sae2<sup>C</sup>. Altogether, these results show that Sae2 directly interacts with Sir3. This interaction  
194 might be the basis of the Sae2 inhibition observed upon Sir3 overexpression.

### 195 **Sae2 and Sir3 interaction prevents Sae2 functions and promotes NHEJ**

196 To functionally test whether Sae2-Sir3 interaction inhibits Sae2, we screened for Sir3  
197 mutants without the capacity to interact with Sae2. To this end, we designed a two-hybrid  
198 screen to select separation of function Sir3 mutants no longer interacting with Sae2, while  
199 retaining interaction with Sir4. For this, we used a strain in which *HIS3* and *LacZ* reporter genes  
200 associate with *GAL1* UAS and *lexAop* DNA targeting sequences respectively. This allows for  
201 the simultaneous assessment of a positive interaction between two proteins, alongside the  
202 loss of interaction between one of those proteins and a third (Figure 4A). We transformed this  
203 strain with plasmids expressing *SIR4<sup>C</sup>* fused to a *GAL4* binding domain and *SAE2<sup>C</sup>* fused to a  
204 *LexA* binding domain that bind upstream of *HIS3* and *lacZ* respectively. A Sir4 binding partner  
205 fused to the Gal4 activating domain will thus activate the expression of *HIS3*, whereas a Sae2  
206 binding partner fused to the Gal4 activating domain will activate the expression of *LacZ*.

207 We performed random mutagenesis of a Sir3 domain sufficient to interact with Sae2  
208 and Sir4 (464-728 aa;(King et al., 2006)), and created a library of mutated *SIR3<sup>SaID</sup>* fused to  
209 the *GAL4* activating domain (GAD). This library was introduced into the screening strain and  
210 Sir3 mutants still able to interact with Sir4 were selected based on their ability to grow on media  
211 lacking histidine and supplemented with aminotriazole (-HIS + 3-AT). This step eliminates non-  
212 sense or non-expressed GAD-SIR3<sup>SaID</sup> mutants. X-Gal staining of His<sup>+</sup> colonies allowed for  
213 the selection of white clones in which the GAD-SIR3<sup>SaID</sup> - LexABD-Sae2<sup>C</sup> interaction was lost.



214 Using this screen, we recovered a mutant deficient for Sir3-Sae2 interaction while proficient  
215 for Sir3-Sir4 interaction. Sequencing of this mutant identified two point mutations T557I and  
216 T598A followed by a frameshift at position 707 (*sir3<sup>Sald-1</sup>*; Figure 4B). These two residues are  
217 not strictly conserved among the *Saccharomycetaceae* family, but T557 is flanked by a  
218 conserved patch (Figure S4). Subcloning of the individual mutations and secondary two-hybrid  
219 tests showed that the mutation T557I alone is sufficient to impair the Sae2-Sir3 interaction  
220 while preserving the Sir4-Sir3 interaction (*sir3<sup>Sald-T557I</sup>*; Figure 4C).

221 To test the functional consequences of the of Sir3-Sae2 interaction loss, we assessed  
222 NHEJ in strains overexpressing either the WT or T557I mutant Sir3<sup>Sald</sup> fragment (Figure 5A).  
223 High-level expression of the Sir3<sup>Sald</sup> fragment was sufficient to promote NHEJ and displayed  
224 an epistatic relationship with the loss of Sae2 (Figure 5A, S6). In contrast, high-level expression  
225 of the mutated fragment had no effect, indicating that Sae2 inhibition by Sir3<sup>Sald</sup> requires an  
226 intact Sae2-Sir3 interaction (Figure 5A).

227 Insertion of the *T557I* mutation in the full-length *SIR3* gene reduced the ability of Sir3  
228 to promote NHEJ when overexpressed (Figure 5B). This correlated with a loss of Sae2-Sir3-  
229 T557I colocalization (Figure 5C). Importantly, the point mutation does not affect the stability of  
230 Sir3 and *sir3-T557I* overexpressing cells retained the ability to form the telomere hypercluster  
231 (Figure 5C, S6) and propagate subtelomeric heterochromatin (Figure 5D). In contrast, Sae2-  
232 GFP no longer formed a single bright focus in Sir3-T557I overexpressing cells (Figure 5C),  
233 indicating that Sae2 clustering requires Sae2-Sir3 interaction. The residual NHEJ observed in  
234 the Sir3-T557I overexpressing strain suggested that it retained some interaction with Sae2.  
235 Indeed, co-immunoprecipitation experiments confirmed a residual interaction with Sae2  
236 (20±10 % of the interaction detected in WT, Figure 5E). Altogether, this data shows that the  
237 Sir3<sup>Sald</sup> domain is sufficient to interact with and inhibit Sae2, and that interaction between Sir3  
238 and Sae2 is necessary to inhibit Sae2 activity.

### 239 **Sae2 and Sir4 compete for Sir3 binding**

240 To explore further the functional consequences of the Sir3-Sae2 interaction, we  
241 assessed NHEJ in the absence of the SIR complex. Strains used lack the *HML* locus to avoid  
242 indirect effects on NHEJ efficiency caused by pseudo-diploidization, as observed following the  
243 derepression of the cryptic mating type loci in strains with *SIR* deletions (Aström et al., 1999;  
244 Frank-Vaillant and Marcand, 2001; Lee et al., 1999). Consistent with an inhibition of Sae2 by  
245 Sir3 expressed at physiological levels, NHEJ was reproducibly decreased by ~2-fold in *sir3Δ*  
246 mutants (Figure 6A). In contrast, *sir4Δ* mutants exhibited a more than 2-fold increase in NHEJ  
247 relative to WT, which was abolished by the additional loss of Sir3 (Figure 6A). This increase  
248 was epistatic with *sae2Δ*, suggesting that Sae2 and Sir4 act in the same pathway to inhibit  
249 NHEJ. Together, these results show that Sir3 is required to increase NHEJ in absence of Sir4

250 and suggest that the regulation of Sae2 by Sir3 is involved. Consistently, the sir3-T557I mutant  
251 impaired for interaction with and inhibition of Sae2, fails to increase NHEJ in absence of Sir4  
252 (Figure 6A). Therefore, physiological levels of Sir3 are sufficient to inhibit Sae2, and Sir4 is  
253 able to counteract this inhibition.

254 As Sae2 and Sir4 interact with the same Sir3 domain, a competition between Sir4 and  
255 Sae2 for Sir3 binding might explain NHEJ increase in cells lacking Sir4 and the dependence  
256 of this increase on Sir3 and Sae2. If Sir4 and Sae2 compete for Sir3 binding, overexpression  
257 of Sir4 should prevent Sir3-Sae2 interaction and counteract the increase in NHEJ caused by  
258 Sir3 overexpression. We tested this hypothesis by Sir4 overexpression, through genomic  
259 insertion of an additional copy of the *SIR4* gene under the control of a strong promoter (*TEF1p*).  
260 As predicted, Sir4 overexpression alongside Sir3 overexpression restored NHEJ to WT levels  
261 whereas it did not affect NHEJ in WT or *sae2Δ* cells (Figure 6B). This indicates that Sir4  
262 overexpression does not affect NHEJ by itself, but instead counteracts Sir3-overexpression-  
263 mediated effects on Sae2. Expressing high levels of Sir4 was also sufficient to disrupt the two-  
264 hybrid interaction detected between Sir3 and Sae2 (Figure 6C) showing that Sir4 binding to  
265 Sir3 counteracts Sir3-Sae2 interaction. Note that the favoured partner of Sir3 at subtelomeres  
266 remains Sir4, since Sae2 overexpression had no effect on silencing (Figure S7). Collectively,  
267 this data is consistent with a model in which Sae2 is inactive when bound to Sir3, but can be  
268 released by the competitive binding of Sir4 to Sir3.

### 269 **Sir3-mediated Sae2 inhibition mechanism**

270 Sae2 inhibition following Sir3 overexpression could result from the sequestration of  
271 Sae2 in the Sir3-mediated telomeric cluster, preventing Sae2 recruitment to DSB. Alternatively,  
272 this could be as a direct consequence of the interaction between the two proteins. If Sae2 is  
273 sequestered, disassembling the telomere cluster while keeping high levels of Sir3 expression  
274 should release Sae2, and relieve Sae2 inhibition, thus restoring WT NHEJ levels. Above, we  
275 showed that overexpression of the Sir3<sup>Sald</sup> fragment is sufficient to increase NHEJ and inhibit  
276 Sae2 (Figure 5A). However, overexpression of this fragment did not promote Sae2 clustering  
277 (Figure 6D), showing that Sae2 inhibition by Sir3 is maintained, even when Sae2 is not trapped  
278 in the telomere cluster. These results indicate that the inhibition of Sae2 is not a secondary  
279 consequence of its sequestration, but rather suggests that Sir3-Sae2 interaction *per se*  
280 inactivates Sae2.

281 How might Sir3-Sae2 interaction inhibit Sae2? Interestingly, the C-terminus of Sae2,  
282 which we have demonstrated as sufficient for Sir3 interaction, also interacts with Rad50. This  
283 interaction requires Sae2 C-terminus phosphorylation and is essential for stimulation of Mre11  
284 nuclease activity (Cannavo and Cejka, 2014; Cannavo et al., 2018). Sir3 binding to Sae2 could  
285 thus impair the interaction between Sae2 and MRX<sup>MRN</sup> by steric hindrance, or by impairing

286 Sae2 C-terminus phosphorylation. Strikingly, typical diffused Mre11 nuclear staining was not  
287 affected upon Sir3 overexpression, and did not co-localise with Sae2, which was concentrated  
288 in the telomere cluster (Figure 6E), indicating that the Sae2-MRX interaction is compromised.  
289 Therefore, Sir3-Sae2 interaction likely impairs Sae2 interaction with MRX, limiting Mre11  
290 nuclease activity and favouring repair by NHEJ.

## 291 Discussion

292 Initiation of DSB end resection is a pivotal decision during DSB repair: it precludes the  
293 “by default” repair by NHEJ and commits cells to repair by HR (Frank-Vaillant and Marcand,  
294 2002; Symington, 2016). The effector of this irreversible pathway choice decision, the MRX-  
295 Sae2 complex, is the focus of various regulatory inputs, including cell cycle phase (Cannavo  
296 and Cejka, 2014; Huertas and Jackson, 2009; Huertas et al., 2008). Here we reveal an  
297 unexpected role for Sir3 in impinging on this pathway choice. Sir3 physically interacts with  
298 Sae2, thus inhibiting its DSB-end resection initiation function and consequently increasing  
299 MRX retention at DSB sites and NHEJ efficiency. Sae2 inhibition is not due to a sequestration  
300 that prevents its recruitment to DSB, but rather relies on the inactivation of Sae2 upon Sir3  
301 binding, the efficiency of which depends on the relative abundance of each protein. This  
302 inactivation seems to impair the interaction between Sae2 and MRX<sup>MRN</sup>, since unlike with  
303 Sae2, Mre11 does not colocalize with Sir3. Sae2 has been shown to bind MRX<sup>MRN</sup> through  
304 several independent interactions involving Mre11, Xrs2 and Rad50 (Cannavo and Cejka, 2014;  
305 Cannavo et al., 2018; Liang et al., 2015) that each could be affected by Sir3 binding to Sae2.  
306 Mre11 does not interact with Sae2 C-terminal fragment *in vitro* (Cannavo et al., 2018), and  
307 Xrs2 interacts with Sae2 N-terminus, which is not involved in Sae2-Sir3 interaction (Liang et  
308 al., 2015). In addition, interaction between Xrs2-Sae2 appears dispensable for DSB end  
309 resection *in vivo* and *in vitro* (Oh et al., 2016). Strikingly, the C-terminus of Sae2, which we  
310 found sufficient to interact with Sir3, also interacts with Rad50 (Cannavo et al., 2018). This  
311 Sae2-Rad50 interaction requires the phosphorylation of Sae2 C-terminus and is essential for  
312 the stimulation of Mre11 nuclease activity by Sae2 (Cannavo and Cejka, 2014; Cannavo et al.,  
313 2018; Zdravković et al., 2021). Sir3-Sae2 interaction could thus specifically impair Sae2-Rad50  
314 interaction by simple steric hindrance or by impairing Sae2 C-terminus phosphorylation.

315 Our data supports a model in which a pool of Sir3-bound Sae2 in subtelomeric  
316 chromatin is prevented from interacting with MRX, or activating its nuclease activity. One  
317 rationale behind limiting the availability of Sae2 could be to limit resection, considering NHEJ  
318 is sufficient for the repair of most DSB. Uncontrolled resection might also drive repair towards  
319 error-prone HR (SSA, BIR) leading to loss of genetic information (Batté et al., 2017; Chen et  
320 al., 2013; Lee et al., 2016; Toledo et al., 2013). Thus, tight control of the Sae2 pool that can  
321 engage in end processing is needed to ensure genome integrity. The Sir3-bound pool of Sae2

322 at subtelomeres is inactive, which limits resection and promotes NHEJ, ensuring genetic  
323 integrity of subtelomeres. Sir3 impact at euchromatic DSB sites suggests that regulating this  
324 pool could also have a more general role in DNA repair. Interestingly, this echoes previous  
325 studies showing that the SIR complex dissociates from telomeres in S-G2 phase or upon  
326 damage induction (Martin et al., 1999; McAinsh et al., 1999; Mills et al., 1999). Since the SIR  
327 complex in solution contains Sir2, Sir3 and Sir4 in a 1:1:1 molar ratio (Cubizolles et al., 2006),  
328 it is unlikely to accommodate Sae2 binding. Release of SIRs from telomeres could thus liberate  
329 a pool of Sae2 free to act at DSB. SIRs also associate with DSBs (Martin et al., 1999; Mills et  
330 al., 1999) where Sir3 could locally control Sae2 activity, limiting MRX activity to prevent  
331 excessive resection.

332 Sae2-Sir3 interaction may also be relevant for telomere length regulation. During  
333 telomere replication, Sae2 has a facultative role in facilitating the generation of the G rich 3'-  
334 ssDNA, the telomerase substrate, and therefore in promoting telomere elongation (Bonetti et  
335 al., 2009). Interestingly, in cells lacking Tel1, where telomerase recruitment depends  
336 exclusively on Mec1 (Amerić and Lingner, 2007), and therefore possibly more so on resection,  
337 Sae2 loss slightly shortens telomeres, compared to Sir3 loss, which elongates them (Figure  
338 S8). In *tel1Δ* cells lacking Sae2, Sir3 loss does not impact telomere length, suggesting that the  
339 telomere elongation observed in the presence of Sae2 might be a consequence of increased  
340 Sae2 activity. Although the network of interactions at telomeres does not allow us to rule out  
341 indirect effects, this data suggests that Sir3 could downregulate Sae2 at telomeres.

342 The inhibition of Sae2 by Sir3 is suppressed by Sir4 overexpression suggesting that Sir4  
343 competes with Sae2 for Sir3 binding, and that this competition modulates the inhibition of Sae2  
344 by Sir3. This competition may explain how Sir4 loss increases NHEJ (Figure 6A), simply by  
345 increasing the pool of Sae2 associated with and inhibited by Sir3. This Sir4-dependent Sae2  
346 activation could also promote telomere protection against NHEJ if telomere-associated Sir3  
347 molecules are in complex with Sir4.

348 The competition between Sae2 and Sir4 for Sir3 binding questions the relevance of  
349 Sae2-Sir3 interaction in subtelomeric heterochromatin. Recent *in vitro* data support a  
350 stoichiometry of two Sir3 molecules and one Sir2-4 dimer per nucleosome (Swygert et al.,  
351 2018). This suggests that one Sir3 molecule per nucleosome might not be interacting with Sir4  
352 on chromatin, leaving room for the binding and inhibition of Sae2 on heterochromatin-bound  
353 Sir3. Consistently, we detect a Sir3-dependent Sae2 binding at subtelomeres in WT cells  
354 (Figure 2B), and the inhibition of Sae2 activity at heterochromatic subtelomeric DSB (Figure  
355 1A). The main function of Sir3-mediated Sae2 inhibition could thus be to protect subtelomeres  
356 from resection, avoiding loss of genetic information and providing chromosome end  
357 deprotection.

358 NHEJ is favoured at heterochromatic DSB, beyond Sae2 inhibition by Sir3, through a  
359 mechanism that remains to be defined. The presence of the NHEJ factor KU at subtelomeres  
360 (Martin et al., 1999), mediated by its interaction with Sir4 (Roy et al., 2004), could favour NHEJ.  
361 Alternatively, the fact that heterochromatin limits resection, likely beyond MRX-Sae2 inhibition,  
362 may stabilise unprocessed DSB ends, therefore increasing NHEJ likelihood. It is striking to  
363 note that NHEJ is favoured in heterochromatic subtelomeres, despite its strong inhibition at  
364 telomere ends (Marcand et al., 2008). This dichotomy is conserved in mammalian cells in  
365 which NHEJ is prevented at telomeres, but not near them (Muraki et al., 2015; van Steensel  
366 et al., 1998). At yeast telomeres, a key NHEJ repressor is Sir4, which acts, at least in part, in  
367 a Sir3 independent manner (Marcand et al., 2008). Sir4 thus seems to have two opposite  
368 functions in NHEJ regulation depending on chromosomal context: a strong repressive function  
369 at telomeres, and a stimulating function at subtelomeres. Several hypotheses can be proposed  
370 to account for these differences. Sir4 could be present in different amounts at subtelomeres  
371 and at telomeres. Alternatively, Sir4 could adopt distinct conformations that would dictate its  
372 ability to inhibit NHEJ depending on its binding partners at telomeres compared to  
373 subtelomeres.

374 In mammals, NHEJ is the prevalent repair mechanism in non-coding and silent  
375 chromatin (Aymard et al., 2014), and in perinuclear heterochromatin (Lemaître et al., 2014).  
376 Furthermore, CtIP interacts with BARD1, a HP1 binding partner, as well as CBX4, an E3  
377 SUMO ligase subunit of the facultative heterochromatin Polycomb complex (Soria-Bretones et  
378 al., 2017; Wu et al., 2015). Whether this is associated with regulation of CtIP activity remains  
379 to be investigated. This data, together with our observations suggest that a regulation of the  
380 MRX<sup>MRN</sup>-Sae2<sup>CtIP</sup> complex by the chromatin context might be a conserved general principle.

381 Here, we provide the first insights into the mechanisms regulating DSB repair in yeast  
382 heterochromatin. We show that the early resection step, which controls the choice between  
383 NHEJ and HR is tightly regulated in heterochromatin. Notably, there is a stringent regulation  
384 of the MRX<sup>MRN</sup> complexes potent end-resection activity, through the direct inhibition of Sae2  
385 <sup>CtIP</sup> by Sir3. To our knowledge, Sir3 is the first Sae2<sup>CtIP</sup> binder capable of impairing Sae2<sup>CtIP</sup>-  
386 MRX<sup>MRN</sup> interaction. Precise characterization of the Sir3-Sae2<sup>CtIP</sup> binding interface may enable  
387 the design of specific synthetic inhibitors towards Sae2<sup>CtIP</sup>-mediated MRX<sup>MRN</sup> activation.

## 388 **Methods**

### 389 **Plasmids**

390 Two-hybrid plasmids (*pACT2-SAE2*, *pACT2-SIR3<sup>SaID</sup>*, *pACT2-SIR3*, *pACT2-SIR3<sup>464-728</sup>*,  
391 *pGBT9-SIR3*, *pGBT9-SAE2<sup>C</sup>*, *pGBT9-SIR3<sup>SaID</sup>*, *pLexA-SAE2<sup>C</sup>*) were constructed by inserting  
392 the full length or appropriate fragments of *SAE2* and *SIR3* genes, amplified from W303  
393 genomic DNA, in *pACT2*, *pGBT9* and *pBTM116* vectors digested by *Bam*HI by single strand  
394 annealing cloning (SLIC, (Li and Elledge, 2007). To test interactions with *Sir4*, the *pGBD-C2-*  
395 *SIR4* plasmid was used (Ehrentraut et al., 2011). *pACT2-sir3<sup>SaID-T557I</sup>* and *pACT2-sir3-T557I*  
396 were generated by rolling circle mutagenesis of *pACT2-SIR3<sup>SaID</sup>* and *pACT2-SIR3* as  
397 described in (Hansson et al., 2008). To overexpress *Sae2*, the *SAE2* gene was amplified from  
398 W303 genomic DNA and inserted in *pRS423* digested by *Sall*-HF by SLIC (Li and Elledge,  
399 2007) to produce *pKD343*. To overexpress *SIR4* for NHEJ assays, *SIR4* amplified from W303  
400 genomic DNA was inserted by SLIC in *pKD431*, an integrative plasmid *pRS403* with a *TEF1p*  
401 promoter, to generate *pKD432*. Genomic integration of the plasmids at *HIS3* is possible after  
402 digestion by *Pst*I.

403 The *SIR3<sup>SaID(531-723)</sup>* fragment was cloned under the T7 promoter into the vector *pnEAvG*  
404 (Diebold et al., 2011) generating *pKD434* that allows GST- *Sir3<sup>SaID</sup>* expression in bacteria.  
405 *SAE2<sup>C</sup>* was cloned into adapted SUMO vector (*pKD435*) allowing His6-SUMO-*Sae2<sup>Cter</sup>* protein  
406 expression.

407 Mutagenesis of the sequence encoding *Sir3<sup>464-728</sup>* using the GeneMorph II EZClone Domain  
408 Mutagenesis Kit (Agilent, 200552-5) was performed by PCR on 9,5 µg of *pACT2-SIR3<sup>464-728</sup>*  
409 with 20 cycles of amplification to allow low mutation rate. The PCR products were subsequently  
410 subcloned by SLIC in *pACT2* and Sanger sequenced for mutation rate estimation.

### 411 **Yeast strains**

412 All strains in this study are isogenic to W303 (Mata (or Mata $\alpha$ ) *ADE2 leu2-3,112 his3-11,15 trp1-*  
413 *1 ura3-1*) and are listed in Table S1. For DSB induction the *I-SCEI* gene was introduced in the  
414 yeast genome by transformation of the cells with *pKD144* (*pRS404-GAL1p-I-SceI*) digested by  
415 *Pml*I to insert in *TRP1*. Gene deletions and insertions of strong constitutive promoters (*GPDp*,  
416 *ADH1p*) were performed by PCR-based gene targeting (Longtine et al., 1998).

417 The *mre11-H125N* allele was introduced in strains by crossing with the *LSY2854-21C* strain  
418 (Chen et al., 2013). *Mre11-YFP* was introduced in strains by cross with the *W5089-6A* strain  
419 (Kaiser et al., 2011). *Sae2-AAGRRIGDGAGLIN-GFP* was constructed by PCR gene targeting  
420 on *pKT128* (Sheff and Thorn, 2004). *SIR3-mCherry* was constructed by PCR gene targeting  
421 on *pSL1* (Léon et al., 2008) whose marker was replaced by Hygromycin B resistance (HPH'),  
422 with primers *pr1328* and *pr1329*.

## 423 **Media and growth conditions**

424 Yeast strains were grown in rich medium (yeast extract–peptone–dextrose, YPD) or synthetic  
425 complete (SC) medium lacking the appropriate amino acid at 30°C. Rich or synthetic medium  
426 containing 2% lactate, 3% glycerol, 0.05% glucose (YPLGg) and lacking the appropriate amino  
427 acids were used to grow the cells overnight prior the induction of I-SceI by plating onto 2%  
428 galactose plates or addition of 2% galactose to liquid culture.

## 429 **NHEJ efficiency measurement**

430 NHEJ efficiency measurement upon induction of a single DSB was performed as previously  
431 described (Batté et al., 2017). Briefly, yeast strains were grown overnight in glycerol lactate  
432 containing medium and plated on 2% galactose plates and on 2% glucose plates to  
433 respectively induce or repress I-SceI. Survival on galactose was normalized with the cell  
434 plating efficiency inferred from survival on glucose. Forty-eight isolated survivors from  
435 galactose containing plates were analysed by PCR and sequenced to characterize NHEJ  
436 repair events. For each strain, at least three independent experiments were performed with  
437 the corresponding controls.

## 438 **Monitoring of DSB-flanking DNA and resection by real-time PCR**

439 Yeast cells were grown in 2 mL of YPD overnight. Cultures were then diluted in YPLGg and  
440 grown to OD600 = 0.3–0.8. The expression of I-SceI was induced by addition of galactose to a  
441 final concentration of 2%. Cell samples were collected before and after induction at different  
442 time points and DNAs were extracted. DNA measurements by quantitative PCRs were  
443 performed using primers located 0.9 kb from the I-SceI cutting site or primers flanking the I-  
444 SceI restriction site. A control primer pair was used to amplify a region of the *OGG1* control  
445 locus. To correct for differences in DSB cleavage efficiency, the fraction of uncut DNA (Fu)  
446 was subtracted from fraction of total DNA at 1 kb (Ft) at each time point and normalized to the  
447 fraction of cleaved DNA (Fc). Thus, cleaved remaining DNA at 1 kb = (Ft-Fu)/Fc.

## 448 **Microscopy**

449 Live cell images were acquired using a wide-field inverted microscope (Leica DMI-6000B)  
450 equipped with Adaptive Focus Control to eliminate Z drift, a 100×/1.4 NA immersion objective  
451 with a Prior NanoScanZ Nanopositioning Piezo Z Stage System, a CMOS camera (ORCA-  
452 Flash4.0; Hamamatsu) and a solid-state light source (SpectraX, Lumencore). The system is  
453 piloted by MetaMorph software (Molecular Device).

454 For GFP-mCherry two-colour images, 19 focal steps of 0.20 μm were acquired sequentially for  
455 GFP and mCherry with an exposure time of 100-200 ms using solid-state 475- and 575-nm  
456 diodes and appropriate filters (GFP-mCherry filter; excitation: double BP, 450–490/550–  
457 590 nm and dichroic double BP 500–550/600–665 nm; Chroma Technology Corp.).

458 Processing was achieved using ImageJ software (National Institutes of Health). YFP images  
459 were acquired at indicated time points before and after DSB induction; 19 focal steps of  
460 0.20  $\mu\text{m}$  were acquired with an exposure time of 200 ms using a solid-state 500-nm diode and  
461 a YFP filter (excitation 470–510 nm and dichroic 495 nm; Chroma Technology Corp.) All the  
462 images shown are z projections of z-stack images.

### 463 **Two-hybrid analyses**

464 The yeast strain Y190 (Wade Harper et al., 1993) was transformed with 2 $\mu$  plasmids encoding  
465 full length or truncated *SAE2* or *SIR3* fused to *GAL4* DNA binding (GBD) or activation (GAD)  
466 domains, and selected on synthetic media without leucine and tryptophane. Protein-protein  
467 interactions were assayed by growing the cells on selective media without leucine, tryptophane  
468 and histidine, complemented with varying concentrations of 3-Amino-1,2,4-triazole (3-AT), a  
469 competitive inhibitor of the *HIS3* gene. Blue coloration of the colony in presence of X-Gal was  
470 used to assess protein interactions. The interactions were defined in comparison to negative  
471 controls, carrying at least one empty vector. When the growth on 3AT containing medium was  
472 higher, or if the blue colour in presence of X-gal was stronger than the negative control then  
473 an interaction between the two chimeric proteins was assumed.

474 To screen for *SIR3* mutants a yeast strain (yKD1991) containing *LYS2::GAL1UAS-HIS3TATA-*  
475 *HIS3* and *URA3::lexAop-lacZ* was constructed by crossing Y190 and CTY10-5d (Bartel and  
476 Fields, 1995)). This strain was transformed with 2 $\mu$  plasmids encoding mutagenized *SIR3*<sup>SalD</sup>  
477 fused to *GAL4* DNA binding domain (GBD), *SAE2*<sup>C</sup> fused *LexA* DNA binding domain (LexABD)  
478 and *SIR4*<sup>C</sup> to *GAL4* activation domain (GAD).

### 479 **Protein fragments cloning and purification**

480 The *Sir3*<sup>SalD</sup> and *Sae2*<sup>C</sup> peptides were expressed in *E. coli* strains BL21 (DE3) transformed  
481 with pKD434 and pKD435 respectively. Expression of the peptides was induced by 0.5 mM  
482 isopropyl- $\beta$ -D-thiogalactoside (IPTG) for 3.5 h. Cells were harvested, suspended in lysis buffer  
483 (50 mM Tris HCl pH8, 500 mM NaCl, 1 mM DTT, 10% glycerol, TritonX-100 x 1, 1 mg/mL  
484 lysozyme, 1 mM 4-(2-aminoethyl) benzenesulphonyl fluoride, 10 mM benzaminide, 2  $\mu\text{M}$   
485 pepstatin) and disrupted by sonication. Extract was cleared by centrifugation at 186000 x g for  
486 1 hour at 4°C.

487 *Sir3*<sup>SalD</sup> containing extract was incubated at 4°C with GSH Sepharose resin (Cytiva,  
488 Marlborough, MA) for 3h. Proteins were eluted with Buffer A (50 mM Tris HCl [pH8@4°C], 100  
489 mM NaCl, 1 mM DTT) complemented with 30 mM glutathione. Fractions containing GST-  
490 protein were pooled and applied to a 1 mL Resource Q column (Cytiva, Marlborough, MA)  
491 equilibrated with buffer A. Protein was eluted with a 12 mL linear gradient of 0.05–1 M NaCl.  
492 Purified GST-protein was stored at -80°C.



493 *Sae2<sup>C</sup>* extract was incubated with 2mL NiNTA resin (Qiagen, Germantown, MD) in batch,  
494 rotated at 4°C for 2h and then poured into a Econo-Column® Chromatography column (Bio-  
495 Rad, Hercules, CA). After extensive washing first with 80 mL of 20 mM Tris HCl [pH8@4°C],  
496 500 mM NaCl, 0,5% NP40, 10% glycerol, 20 mM Imidazole followed by 80 mL of 20 mM Tris  
497 HCl [pH8@4°C], 100 mM NaCl, 1 mM DTT, 10% glycerol, 20 mM Imidazole, on-column  
498 cleavage was achieved by adding his-SUMO-Protease to a ratio of 80/1 (W/W). Untagged  
499 *Sae2<sup>Cter</sup>* was recovered from the flow through which was then applied to a 1 mL Resource S  
500 column (Cytiva, Marlborough, MA) equilibrated with buffer B (20 mM Tris HCl [pH8@4°C], 50  
501 mM NaCl, 1 mM DTT). Protein was eluted with a 20 mL linear gradient of 0.05–1 M NaCl.  
502 Purified *Sae2<sup>Cter</sup>* was stored at -80°C.

### 503 **GST pull-down assays**

504 GST-*Sir3<sup>Sald</sup>* fragment (10 µg) or GST protein as a control (10µg) were immobilized on 20 µL  
505 Glutathione Sepharose 4B in 300 µL of buffer A (50 mM Tris HCl [pH8@4°C], 150 mM NaCl,  
506 1 mM DTT, 0.5 mM EDTA, 10% Glycerol), complemented with 2 mM MgCl<sub>2</sub> and 25 units of  
507 benzonase for 90 minutes at 4°C. Beads were collected by centrifugation, and washed three  
508 times with 300 µL of buffer B (buffer A + 0.05% NP40). *Sae2<sup>C</sup>* (10 µg in 100 µL buffer B  
509 complemented with 2 mM MgCl<sub>2</sub> and 25 units of benzonase) was then added and incubated  
510 for 150 minutes at 4°C with gentle agitation. The supernatant was removed and the beads  
511 were washed two times with 300 µL of buffer B. Proteins bound to the beads were then eluted  
512 by addition of 20 µL of 50 mM Tris-HCl [pH8@4°C], 150 mM NaCl, 1 mM DTT, 30 mM  
513 glutathione. Proteins bound to the beads were resolved on 15% SDS-PAGE.

### 514 **Co-immunoprecipitation (Co-IP)**

515 Immunoprecipitations were performed as previously described (Forey et al., 2021) by lysing  
516 40 to 50 OD600 units of exponential phase cultures. After sonication, clarification and  
517 benzonase treatment (250 u/1 mg protein, SIGMA E1014-5KU) extracts were incubated 1h at  
518 4°C with 50 µL magnetic beads (Dynabeads M-280 sheep anti-mouse IgG ,invitrogen 11202D)  
519 coated with anti-GFP antibodies (Roche ref:11814460001). Proteins extracts were resolved  
520 on 4-15% polyacrylamide gels, transferred on iBlot PVDF Membranes that were probed with  
521 anti-GFP (1:1000, Roche ref:11814460001) and custom-made anti-Sir3 (1:10000; (Ruault et  
522 al., 2011) antibodies.

### 523 **Chromatin immunoprecipitation (ChIP)**

524 Exponentially growing cells were crosslinked for 15 min with 1% formaldehyde (Sigma F8775)  
525 at RT under agitation followed by quenching by addition of 0.125 M Glycine (Sigma G8898)  
526 for 5 min under agitation. Cells were washed three times with cold 20mM Tris (4°C). Dry pellets  
527 were frozen and conserved at -80°C. Cell pellets were resuspended in lysis buffer (50 mM

528 HEPES-KOH pH7.5, 140 mM NaCl, 5 mM EDTA, 1% Triton X-100, 0.1% Na-deoxycholate)  
529 supplemented with 1 mM AEBSF (ThermoFisher 10563165) and anti-protease (Complete  
530 ULTRA SIGMA ref: 5892988001) and lysed with a Precellys homogenizer. Whole cell extracts  
531 were centrifuged 20 min at 13535 rpm and the chromatin containing pellet was resuspended  
532 in 300  $\mu$ L lysis buffer. Sonication of chromatin was performed using a Diagenod Bioruptor at  
533 high setting for 3 cycles: 30 seconds ON + 30 seconds OFF. Dynabeads (Panmous IgG,  
534 Invitrogen 11041) were washed three times and resuspended in 1 mL of PBS, 0.1% BSA and  
535 incubated with antibodies (10  $\mu$ L anti-GFP (1:1000, Roche ref:11814460001)/50  $\mu$ L beads) on  
536 a rotating wheel for two hours at 4 °C. Antibody-coupled Dynabeads were washed three times  
537 with 1 mL of PBS, 0.1% BSA, and incubated with 400  $\mu$ L of sonicated chromatin for 2h at 21°C.  
538 Beads were washed on ice with cold solutions: two times with lysis buffer, once with wash  
539 buffer (10 mM Tris-HCl pH8, 0.25 M LiCl, 0.5% NP40, 5 mM EDTA, 0.5% Na-deoxycholate)  
540 and once with TE (10 mM Tris-HCl pH8, 1 mM EDTA). Antibodies were un-coupled from beads  
541 with elution buffer (25 mM Tris-HCl pH8, 5 mM EDTA, 0,5% SDS) for 20 min at 65°C. Eluates  
542 were collected and incubated overnight at 65°C for de-crosslinking. RNase A (Sigma, R65-13)  
543 and Pronase were added to samples and incubated for 1 hour at 37 °C. DNA was purified (DNA  
544 clean up kit, ThermoScientific K0832) and eluted in 50  $\mu$ L of elution buffer. The relative amount  
545 of DNA was quantified by qPCR (primers listed in Table S2). Sae2-GFP enrichment was  
546 normalized to an internal control locus (OGG1).

#### 547 **Acknowledgements**

548 We thank Z. Xu, A. Piazza, R. Koszul and Jamie Phipps for critical reading of this manuscript  
549 and members of the Marcand and Dubrana laboratories for stimulating discussions. We thank  
550 Susan Gasser, Ann E. Ehrenhofer-Murray, Lorraine Symington, Rodney Rothstein, Laurent  
551 Maloisel and Florian Roisé-Hamelin for sharing plasmids and strains and Angela Taddei for  
552 the custom-made rabbit polyclonal antibodies raised against full-length Sir3. This work was  
553 supported by grants from Fondation pour la recherche médicale (DEP20131128535), and from  
554 the European Research Council under the European Community's Seventh Frame- work  
555 Program (FP7/2007 2013/European Research Council Grant Agreement 281287), Fondation  
556 ARC pour la Recherche sur le Cancer (PJA-20191209432), CEA Radiation biology program  
557 and EDF. HB was supported by a fellowship from the CEA- IRTELIS PhD program.

## References:

Allshire, R.C., and Madhani, H.D. (2018). Ten principles of heterochromatin formation and function. *Nat. Rev. Mol. Cell Biol.* 19, 229–244.

Arnerić, M., and Lingner, J. (2007). Tel1 kinase and subtelomere-bound Tbf1 mediate preferential elongation of short telomeres by telomerase in yeast. *EMBO Rep.* 8, 1080–1085.

Aström, S.U., Okamura, S.M., and Rine, J. (1999). Yeast cell-type regulation of DNA repair. *Nature* 397, 310.

Aymard, F., Bugler, B., Schmidt, C.K., Guillou, E., Caron, P., Briois, S., Iacovoni, J.S., Daburon, V., Miller, K.M., Jackson, S.P., et al. (2014). Transcriptionally active chromatin recruits homologous recombination at DNA double-strand breaks. *Nat. Struct. Mol. Biol.* 21, 366–374.

Baroni, E., Viscardi, V., Cartagena-Lirola, H., Lucchini, G., and Longhese, M.P. (2004). The Functions of Budding Yeast Sae2 in the DNA Damage Response Require Mec1- and Tel1-Dependent Phosphorylation. *Mol. Cell Biol.* 24, 4151–4165.

Bartel, P.L., and Fields, S. (1995). Analyzing protein-protein interactions using two-hybrid system. *Methods Enzymol.* 254, 241–263.

Batté, A., Brocas, C., Bordelet, H., Hocher, A., Ruault, M., Adjiri, A., Taddei, A., and Dubrana, K. (2017). Recombination at subtelomeres is regulated by physical distance, double-strand break resection and chromatin status. *EMBO J.* 36, 2609–2625.

Bazzano, D., Lomonaco, S., and Wilson, T.E. (2021). Mapping yeast mitotic 5' resection at base resolution reveals the sequence and positional dependence of nucleases in vivo. *BioRxiv* 2021.02.27.433206.

Behrouzi, R., Lu, C., Currie, M.A., Jih, G., Iglesias, N., and Moazed, D. (2016). Heterochromatin assembly by interrupted Sir3 bridges across neighboring nucleosomes. *ELife* 5.

Bonetti, D., Martina, M., Clerici, M., Lucchini, G., and Longhese, M.P. (2009). Multiple pathways regulate 3' overhang generation at *S. cerevisiae* telomeres. *Mol. Cell* 35, 70–81.

Cannavo, E., and Cejka, P. (2014). Sae2 promotes dsDNA endonuclease activity within Mre11-Rad50-Xrs2 to resect DNA breaks. *Nature* 514, 122–125.

Cannavo, E., Johnson, D., Andres, S.N., Kissling, V.M., Reinert, J.K., Garcia, V., Erie, D.A., Hess, D., Thomä, N.H., Enchev, R.I., et al. (2018). Regulatory control of DNA end resection by Sae2 phosphorylation. *Nat. Commun.* 9, 4016.

Chen, X., and Tomkinson, A.E. (2011). Yeast Nej1 Is a Key Participant in the Initial End Binding and Final Ligation Steps of Nonhomologous End Joining. *J. Biol. Chem.* 286, 4931–4940.

Chen, H., Lisby, M., and Symington, L.S. (2013). RPA coordinates DNA end resection and prevents formation of DNA hairpins. *Mol. Cell* 50.

Chen, H., Xue, J., Churikov, D., Hass, E.P., Shi, S., Lemon, L.D., Luciano, P., Bertuch, A.A., Zappulla, D.C., Géli, V., et al. (2018). Structural Insights into Yeast Telomerase Recruitment to Telomeres. *Cell* 172, 331-343.e13.

Chiolo, I., Minoda, A., Colmenares, S.U., Polyzos, A., Costes, S.V., and Karpen, G.H. (2011). Double-strand breaks in heterochromatin move outside of a dynamic HP1a domain to complete recombinational repair. *Cell* *144*, 732–744.

Clerici, M., Mantiero, D., Lucchini, G., and Longhese, M.P. (2006). The *Saccharomyces cerevisiae* Sae2 protein negatively regulates DNA damage checkpoint signalling. *EMBO Rep.* *7*, 212–218.

Cubizolles, F., Martino, F., Perrod, S., and Gasser, S.M. (2006). A homotrimer-heterotrimer switch in Sir2 structure differentiates rDNA and telomeric silencing. *Mol. Cell* *21*, 825–836.

Dalby, A.B., Goodrich, K.J., Pflingsten, J.S., and Cech, T.R. (2013). RNA recognition by the DNA end-binding Ku heterodimer. *RNA* *19*, 841–851.

Diebold, M.-L., Fribourg, S., Koch, M., Metzger, T., and Romier, C. (2011). Deciphering correct strategies for multiprotein complex assembly by co-expression: application to complexes as large as the histone octamer. *J. Struct. Biol.* *175*, 178–188.

Ehrentraut, S., Hassler, M., Oppikofer, M., Kueng, S., Weber, J.M., Mueller, J.W., Gasser, S.M., Ladumer, A.G., and Ehrenhofer-Murray, A.E. (2011). Structural basis for the role of the Sir3 AAA+ domain in silencing: interaction with Sir4 and unmethylated histone H3K79. *Genes Dev.* *25*, 1835–1846.

Faure, G., Jézéquel, K., Roisné-Hamelin, F., Bitard-Feildel, T., Lamiable, A., Marcand, S., and Callebaut, I. (2019). Discovery and Evolution of New Domains in Yeast Heterochromatin Factor Sir4 and Its Partner Esc1. *Genome Biol. Evol.* *11*, 572–585.

Forey, R., Barthe, A., Tittel-Elmer, M., Wery, M., Barrault, M.-B., Ducrot, C., Seeber, A., Krietenstein, N., Szachnowski, U., Skrzypczak, M., et al. (2021). A Role for the Mre11-Rad50-Xrs2 Complex in Gene Expression and Chromosome Organization. *Mol. Cell* *81*, 183-197.e6.

Frank-Vaillant, M., and Marcand, S. (2001). NHEJ regulation by mating type is exercised through a novel protein, Lif2p, essential to the Ligase IV pathway. *Genes Dev.* *15*, 3005–3012.

Frank-Vaillant, M., and Marcand, S. (2002). Transient Stability of DNA Ends Allows Nonhomologous End Joining to Precede Homologous Recombination. *Mol. Cell* *10*, 1189–1199.

Fu, Q., Chow, J., Bernstein, K.A., Makharashvili, N., Arora, S., Lee, C.-F., Person, M.D., Rothstein, R., and Paull, T.T. (2014). Phosphorylation-Regulated Transitions in an Oligomeric State Control the Activity of the Sae2 DNA Repair Enzyme. *Mol. Cell. Biol.* *34*, 778–793.

Garcia, V., Phelps, S.E.L., Gray, S., and Neale, M.J. (2011). Bidirectional resection of DNA double-strand breaks by Mre11 and Exo1. *Nature* *479*, 241.

Gartenberg, M.R., and Smith, J.S. (2016). The Nuts and Bolts of Transcriptionally Silent Chromatin in *Saccharomyces cerevisiae*. *Genetics* *203*, 1563–1599.

Goodarzi, A.A., Noon, A.T., Deckbar, D., Ziv, Y., Shiloh, Y., Löbrich, M., and Jeggo, P.A. (2008). ATM Signaling Facilitates Repair of DNA Double-Strand Breaks Associated with Heterochromatin. *Mol. Cell* *31*, 167–177.

Hansson, M.D., Rzeznicka, K., Rosenbäck, M., Hansson, M., and Sirijovski, N. (2008). PCR-mediated deletion of plasmid DNA. *Anal. Biochem.* *375*, 373–375.

Hass, E.P., and Zappulla, D.C. (2015). The Ku subunit of telomerase binds Sir4 to recruit telomerase to lengthen telomeres in *S. cerevisiae*. *ELife* 4, e07750.

Hecht, A., Strahl-Bolsinger, S., and Grunstein, M. (1996). Spreading of transcriptional repressor SIR3 from telomeric heterochromatin. *Nature* 383, 92.

Hocher, A., Ruault, M., Kaferle, P., Descrimes, M., Garnier, M., Morillon, A., and Taddei, A. (2018). Expanding heterochromatin reveals discrete subtelomeric domains delimited by chromatin landscape transitions. *Genome Res.* 28, 1867–1881.

Huertas, P., and Jackson, S.P. (2009). Human CtIP mediates cell cycle control of DNA end resection and double strand break repair. *J. Biol. Chem.* 284, 9558–9565.

Huertas, P., Cortés-Ledesma, F., Sartori, A.A., Aguilera, A., and Jackson, S.P. (2008). CDK targets Sae2 to control DNA-end resection and homologous recombination. *Nature* 455, 689–692.

Kaiser, G.S., Germann, S.M., Westergaard, T., and Lisby, M. (2011). Phenylbutyrate inhibits homologous recombination induced by camptothecin and methyl methanesulfonate. *Mutat. Res.* 713, 64–75.

Katan-Khaykovich, Y., and Struhl, K. (2005). Heterochromatin formation involves changes in histone modifications over multiple cell generations. *EMBO J.* 24, 2138–2149.

Kegel, A., Sjöstrand, J.O.O., and Åström, S.U. (2001). Nej1p, a cell type-specific regulator of nonhomologous end joining in yeast. *Curr. Biol.* 11, 1611–1617.

King, D.A., Hall, B.E., Iwamoto, M.A., Win, K.Z., Chang, J.F., and Ellenberger, T. (2006). Domain Structure and Protein Interactions of the Silent Information Regulator Sir3 Revealed by Screening a Nested Deletion Library of Protein Fragments. *J. Biol. Chem.* 281, 20107–20119.

Larson, A.G., Elnatan, D., Keenen, M.M., Trnka, M.J., Johnston, J.B., Burlingame, A.L., Agard, D.A., Redding, S., and Narlikar, G.J. (2017). Liquid droplet formation by HP1 $\alpha$  suggests a role for phase separation in heterochromatin. *Nature* 547, 236–240.

Lee, K., and Lee, S.E. (2007). *Saccharomyces cerevisiae* Sae2- and Tel1-Dependent Single-Strand DNA Formation at DNA Break Promotes Microhomology-Mediated End Joining. *Genetics* 176, 2003–2014.

Lee, C.-S., Wang, R.W., Chang, H.-H., Capurso, D., Segal, M.R., and Haber, J.E. (2016). Chromosome position determines the success of double-strand break repair. *Proc. Natl. Acad. Sci. U. S. A.* 113, E146-154.

Lee, S.E., Pâques, F., Sylvan, J., and Haber, J.E. (1999). Role of yeast SIR genes and mating type in directing DNA double-strand breaks to homologous and non-homologous repair paths. *Curr. Biol.* CB 9, 767–770.

Lemaître, C., Grabarz, A., Tsouroula, K., Andronov, L., Furst, A., Pankotai, T., Heyer, V., Rogier, M., Attwood, K.M., Kessler, P., et al. (2014). Nuclear position dictates DNA repair pathway choice. *Genes Dev.* 28, 2450–2463.

Léon, S., Erpapazoglou, Z., and Haguener-Tsapis, R. (2008). Ear1p and Ssh4p Are New Adaptors of the Ubiquitin Ligase Rsp5p for Cargo Ubiquitylation and Sorting at Multivesicular Bodies. *Mol. Biol. Cell* 19, 2379–2388.

Li, M.Z., and Elledge, S.J. (2007). Harnessing homologous recombination in vitro to generate recombinant DNA via SLIC. *Nat. Methods* 4, 251–256.

Liang, J., Suhandynata, R.T., and Zhou, H. (2015). Phosphorylation of Sae2 Mediates Forkhead-associated (FHA) Domain-specific Interaction and Regulates Its DNA Repair Function. *J. Biol. Chem.* 290, 10751–10763.

Lisby, M., and Rothstein, R. (2004). Choreography of the DNA Damage Response: Spatiotemporal Relationships among Checkpoint and Repair Proteins. *Cell* 118, 699–713.

Longtine, M.S., McKenzie, A., Demarini, D.J., Shah, N.G., Wach, A., Brachat, A., Philippsen, P., and Pringle, J.R. (1998). Additional modules for versatile and economical PCR-based gene deletion and modification in *Saccharomyces cerevisiae*. *Yeast* Chichester Engl. 14, 953–961.

Machida, S., Takizawa, Y., Ishimaru, M., Sugita, Y., Sekine, S., Nakayama, J., Wolf, M., and Kurumizaka, H. (2018). Structural Basis of Heterochromatin Formation by Human HP1. *Mol. Cell* 69, 385–397.e8.

Mahaney, B.L., Lees-Miller, S.P., and Cobb, J.A. (2014). The C-terminus of Nej1 is critical for nuclear localization and non-homologous end-joining. *DNA Repair* 14, 9–16.

Marcand, S., Pardo, B., Gratias, A., Cahun, S., and Callebaut, I. (2008). Multiple pathways inhibit NHEJ at telomeres. *Genes Dev.* 22, 1153–1158.

Martin, S.G., Laroche, T., Suka, N., Grunstein, M., and Gasser, S.M. (1999). Relocalization of Telomeric Ku and SIR Proteins in Response to DNA Strand Breaks in Yeast. *Cell* 97, 621–633.

Matsuzaki, K., Shinohara, A., and Shinohara, M. (2008). Forkhead-Associated Domain of Yeast Xrs2, a Homolog of Human Nbs1, Promotes Nonhomologous End Joining Through Interaction With a Ligase IV Partner Protein, Lif1. *Genetics* 179, 213–225.

McAinsh, A.D., Scott-Drew, S., Murray, J.A., and Jackson, S.P. (1999). DNA damage triggers disruption of telomeric silencing and Mec1p-dependent relocation of Sir3p. *Curr. Biol.* CB 9, 963–966.

Meister, P., and Taddei, A. (2013). Building silent compartments at the nuclear periphery: a recurrent theme. *Curr. Opin. Genet. Dev.* 23, 96–103.

Mills, K.D., Sinclair, D.A., and Guarente, L. (1999). MEC1-Dependent Redistribution of the Sir3 Silencing Protein from Telomeres to DNA Double-Strand Breaks. *Cell* 97, 609–620.

Mimitou, E.P., and Symington, L.S. (2008). Sae2, Exo1 and Sgs1 collaborate in DNA double-strand break processing. *Nature* 455, 770–774.

Muraki, K., Han, L., Miller, D., and Murnane, J.P. (2015). Processing by MRE11 is involved in the sensitivity of subtelomeric regions to DNA double-strand breaks. *Nucleic Acids Res.* 43, 7911–7930.

Oh, J., Al-Zain, A., Cannavo, E., Cejka, P., and Symington, L.S. (2016). Xrs2 Dependent and Independent Functions of the Mre11-Rad50 Complex. *Mol. Cell* 64, 405–415.

Palmbo, P.L., Daley, J.M., and Wilson, T.E. (2005). Mutations of the Yku80 C Terminus and Xrs2 FHA Domain Specifically Block Yeast Nonhomologous End Joining. *Mol. Cell. Biol.* 25, 10782–10790.

Palmbos, P.L., Wu, D., Daley, J.M., and Wilson, T.E. (2008). Recruitment of *Saccharomyces cerevisiae* Dnl4–Lif1 Complex to a Double-Strand Break Requires Interactions With Yku80 and the Xrs2 FHA Domain. *Genetics* *180*, 1809–1819.

Renauld, H., Aparicio, O.M., Zierath, P.D., Billington, B.L., Chhablani, S.K., and Gottschling, D.E. (1993). Silent domains are assembled continuously from the telomere and are defined by promoter distance and strength, and by SIR3 dosage. *Genes Dev.* *7*, 1133–1145.

Robert, T., Vanoli, F., Chiolo, I., Shubassi, G., Bernstein, K.A., Rothstein, R., Botrugno, O.A., Parazzoli, D., Oldani, A., Minucci, S., et al. (2011). HDACs link the DNA damage response, processing of double-strand breaks and autophagy. *Nature* *471*, 74–79.

Roy, R., Meier, B., McAinsh, A.D., Feldmann, H.M., and Jackson, S.P. (2004). Separation-of-function Mutants of Yeast Ku80 Reveal a Yku80p–Sir4p Interaction Involved in Telomeric Silencing. *J. Biol. Chem.* *279*, 86–94.

Ruault, M., De Meyer, A., Loïodice, I., and Taddei, A. (2011). Clustering heterochromatin: Sir3 promotes telomere clustering independently of silencing in yeast. *J. Cell Biol.* *192*, 417–431.

Ruault, M., Scolari, V.F., Lazar-Stefanita, L., Hocher, A., Loïodice, I., Koszul, R., and Taddei, A. (2021). Sir3 mediates long-range chromosome interactions in budding yeast. *Genome Res.* *31*, 411–425.

Sheff, M.A., and Thorn, K.S. (2004). Optimized cassettes for fluorescent protein tagging in *Saccharomyces cerevisiae*. *Yeast Chichester Engl.* *21*, 661–670.

Soria-Bretones, I., Cepeda-García, C., Checa-Rodríguez, C., Heyer, V., Reina-San-Martin, B., Soutoglou, E., and Huertas, P. (2017). DNA end resection requires constitutive sumoylation of CtIP by CBX4. *Nat. Commun.* *8*, 113.

van Steensel, B., Smogorzewska, A., and de Lange, T. (1998). TRF2 protects human telomeres from end-to-end fusions. *Cell* *92*, 401–413.

Strahl-Bolsinger, S., Hecht, A., Luo, K., and Grunstein, M. (1997). SIR2 and SIR4 interactions differ in core and extended telomeric heterochromatin in yeast. *Genes Dev.* *11*, 83–93.

Strom, A.R., Emelyanov, A.V., Mir, M., Fyodorov, D.V., Darzacq, X., and Karpen, G.H. (2017). Phase separation drives heterochromatin domain formation. *Nature* *547*, 241–245.

Swygert, S.G., Senapati, S., Bolukbasi, M.F., Wolfe, S.A., Lindsay, S., and Peterson, C.L. (2018). SIR proteins create compact heterochromatin fibers. *Proc. Natl. Acad. Sci.* *115*, 12447–12452.

Symington, L.S. (2016). Mechanism and Regulation of DNA End Resection in Eukaryotes. *Crit. Rev. Biochem. Mol. Biol.* *51*, 195–212.

Toledo, L.I., Altmeyer, M., Rask, M.-B., Lukas, C., Larsen, D.H., Povlsen, L.K., Bekker-Jensen, S., Mailand, N., Bartek, J., and Lukas, J. (2013). ATR Prohibits Replication Catastrophe by Preventing Global Exhaustion of RPA. *Cell* *155*, 1088–1103.

Tsabar, M., Eapen, V.V., Mason, J.M., Memisoglu, G., Waterman, D.P., Long, M.J., Bishop, D.K., and Haber, J.E. (2015). Caffeine impairs resection during DNA break repair by reducing the levels of nucleases Sae2 and Dna2. *Nucleic Acids Res.* *43*, 6889–6901.

Tsouroula, K., Furst, A., Rogier, M., Heyer, V., Maglott-Roth, A., Ferrand, A., Reina-San-Martin, B., and Soutoglou, E. (2016). Temporal and Spatial Uncoupling of DNA Double Strand Break Repair Pathways within Mammalian Heterochromatin. *Mol. Cell* 63, 293–305.

Valencia, M., Bentele, M., Vaze, M.B., Herrmann, G., Kraus, E., Lee, S.E., Schär, P., and Haber, J.E. (2001). *NEJ1* controls non-homologous end joining in *Saccharomyces cerevisiae*. *Nature* 414, 666–669.

Wade Harper, J., Adami, G.R., Wei, N., Keyomarsi, K., and Elledge, S.J. (1993). The p21 Cdk-interacting protein Cip1 is a potent inhibitor of G1 cyclin-dependent kinases. *Cell* 75, 805–816.

Wu, W., Nishikawa, H., Fukuda, T., Vittal, V., Asano, M., Miyoshi, Y., Klevit, R.E., and Ohta, T. (2015). Interaction of BARD1 and HP1 Is Required for BRCA1 Retention at Sites of DNA Damage. *Cancer Res.* 75, 1311–1321.

Yu, H., Braun, P., Yildirim, M.A., Lemmens, I., Venkatesan, K., Sahalie, J., Hirozane-Kishikawa, T., Gebreab, F., Li, N., Simonis, N., et al. (2008). High-quality binary protein interaction map of the yeast interactome network. *Science* 322, 104–110.

Yu, T.-Y., Kimble, M.T., and Symington, L.S. (2018). Sae2 antagonizes Rad9 accumulation at DNA double-strand breaks to attenuate checkpoint signaling and facilitate end resection. *Proc. Natl. Acad. Sci. U. S. A.* 115, E11961–E11969.

Zdravković, A., Daley, J.M., Dutta, A., Niwa, T., Murayama, Y., Kanamaru, S., Ito, K., Maki, T., Argunhan, B., Takahashi, M., et al. (2021). A conserved Ctp1/CtIP C-terminal peptide stimulates Mre11 endonuclease activity. *Proc. Natl. Acad. Sci. U. S. A.* 118.

## Figure Legends

### Figure 1: Sir3 overexpression inhibits Sae2 and increases error-prone NHEJ

A. Schematic representation of the assay used to estimate error-prone NHEJ at euchromatic DSB.

B. Survival frequencies observed after DSB induction at TEL6R in WT, *dnl4Δ*, *sir4Δ* cells, expressing or not high levels of Sir3p (*oeSir3* and WT respectively). Error bars indicate survival standard error (SEM) of at least three independent experiments.

C. Survival frequencies observed after DSB induction at LYS2 in the indicated strains. Error bars indicate survival standard error (SEM) of at least three independent experiments.

D. Schematic representation of the LYS2 locus with primers located at 1 kb from the I-SceI site for the DNA measurements (blue arrows).

E. DNA levels measured at 1 kb from the I-SceI cut site at LYS2 over time by qPCR in WT and *sae2Δ* cells expressing or not high levels of Sir3p (*oeSir3* and WT respectively). DNA levels were normalized to DNA levels at the OGG1 locus and corrected for differences in DSB cleavage efficiency (see Materials and Methods for details). Error bars represent the standard deviation (SD) of three independent experiments.



F. Representative images of Mre11-YFP foci in response to an I-SceI-induced DSB at LYS2 in WT cells, expressing or not high levels of Sir3p (oeSir3 and WT respectively). Scale bars are 2  $\mu$ m.

G. Quantification of cells with Mre11-YFP foci after DSB induction at LYS2 I-SceI cleavage site in WT, *sae2* $\Delta$  and Sir3 overexpressing (oeSir3) strains. Error bars indicate survival standard error (SEM) of at least three independent experiments.

H. Survival frequencies after DSB induction at LYS2 locus, in strains where SIR3 is expressed from its native, pADH1 or pGPD promoters respectively and in which SAE2 is expressed or not from a high copy number 2 $\mu$  plasmid. Fold increase in Sir3 protein by pAHD1 or pGPD (Hocher et al 2018) is indicated. Error bars indicate survival standard error (SEM) of at least three independent experiments.

## Figure 2: Sir3 and Sae2 physically interact

A. Representative images of Sir3-mCherry and Sae2-GFP signal in WT and SIR3 overexpressing cells. Scale bars are 2  $\mu$ m.

B. Sir3-binding at TEL6R in untagged, WT, *sir3* $\Delta$  cells or in cells overexpressing Sir3 (oeSir3). Binding is probed by ChIP-qPCR 0.2 (red arrows) and 1kb (blue arrows) from telomeres using antibodies against Sae2-GFP. The mean of three independent biological replicates is shown and error bars correspond to the variation between replicates.

C. Co-immunoprecipitation between Sir3 and Sae2-GFP from cells overexpressing Sir3, analysed by Western blot with anti-GFP and anti-Sir3 antibodies.

D. Co-immunoprecipitation between Sir3 and Sae2-GFP from WT cells using antibodies against Sae2-GFP, analysed by Western blot.

## Figure 3: Direct physical interaction between Sir3<sup>SaID</sup> and Sae2<sup>C</sup> domains

A. Schematic representation of Sir3 and Sae2 protein domains.

B. Delineation of the Sir3 domain responsible for interaction with Sae2 by two-hybrid assays. The GAL4-BD fusions with indicated Sir3 fragments were tested in combination with a GAL4-AD-Sae2 fusion; “+” indicates an interaction.

C. Delineation of the Sae2 domain responsible for interaction with Sir3 by two-hybrid assays. The GAL4-BD fusions with indicated Sae2 fragments were tested in combination with a GAL4-AD-Sir3 fusion; “+” indicates an interaction.

D. Yeast two-hybrid interaction analysis between Sae2<sup>C</sup> and Sir3<sup>SaID</sup> domains in WT or *sir3* $\Delta$  cells. Growth on -His + 3AT and blue coloration on X-gal indicate an interaction.

E. Representative silver-stained gels of in vitro GST-pulldown of GST or GST-Sir3<sup>SaID</sup> and Sae2<sup>C</sup> purified peptides. Control: Sae2<sup>C</sup> (300 ng, lane 4).

#### **Figure 4: The T557I point mutation in Sir3 abolishes Sae2-Sir3 interaction**

A. Schematic representation of the assay used to screen for SIR3 mutants deficient for Sae2 interaction while maintaining interaction with Sir4. The SIR3<sup>SaID</sup> fragment (464-728) was mutagenized by PCR, cloned in the pACT2 two hybrid plasmid and transformed into the reporter strain along with plasmids expressing LexA-BD-SAE2<sup>C</sup> and GAL4-BD-SIR4<sup>C</sup> fusion proteins. The reporter strain (yKD1991) bears a Gal4 binding sequence (Gal4BD) upstream of a HIS3 reporter gene, and a LexA binding sequence (LexABD) precedes a LacZ reporter gene. Transformants in which GAL4-BD-SIR4<sup>C</sup> interacts with SIR3<sup>SaID</sup>-GAL4-AD fragment were selected for HIS3 expression on -HIS + 3AT medium and subsequently screened for LacZ expression upon X-gal coloration. Cells showing no LacZ expression were collected and the mutated sir3<sup>SaID</sup>-GAL4-AD was retrieved and sequenced.

B. Representative images of two hybrid assays in the yKD1991 strain testing the interaction of the WT or the mutant SIR3<sup>SaID</sup> fragment isolated from the screen with SAE2<sup>C</sup> or SIR4<sup>C</sup>.

C. Representative images of two hybrid assays testing the interaction of the WT or the mutant SIR3<sup>SaIDT557I</sup> fragment with SAE2<sup>C</sup> or SIR4<sup>C</sup>.

#### **Figure 5: Sir3-Sae2 interaction prevents Sae2 function and promotes NHEJ**

A. Survival frequencies after DSB induction at LYS2 locus in WT or sae2 $\Delta$  strains where the Sir3<sup>SaID</sup> or Sir3<sup>SaIDT557I</sup> domains are overexpressed from a GPD promoter at the SIR3 locus. Error bars indicate survival standard error (SEM) of at least three independent experiments.

B. Survival frequencies after DSB induction at LYS2 locus in the indicated strains. Error bars indicate survival standard error (SEM) of at least three independent experiments.

C. Representative images of Sir3-mCherry and Sae2-GFP signal in cells overexpressing Sir3 and sir3T557I. Scale bars are 2  $\mu$ m.

D. Telomeric silencing assay at TEL7L in WT, sir4 $\Delta$ , sir3T557I cells, cells overexpressing SIR3 (oeSIR3) or sir3T557I (oesir3T557I). Increased growth on 5-FOA or decreased growth on -URA plates reflects an increase in telomeric silencing.

E. Co-immunoprecipitation between Sae2-GFP and Sir3 from untagged, Sae2-GFP WT cells, and Sae2-GFP cells overexpressing WT Sir3 (oeSir3, WT), Sae2-GFP sir3 $\Delta$  or Sae2-GFP overexpressing the sir3-T557I mutant (oeSir3, T557I) using antibodies against Sae2-GFP, analysed by Western blot with anti-GFP and anti-Sir3 antibodies.

#### **Figure 6: Sir3-Sae2 interaction is modulated by Sir4 and impairs Sae2-MRX interaction.**

A. Survival frequencies after DSB induction at LYS2 locus in the indicated strains. Error bars indicate survival standard error (SEM) of at least three independent experiments.

B. Survival frequencies after DSB induction at LYS2 locus in the indicated strains. Insertion of the strong TEF1p promoter upstream of the SIR4 ORF leads to Sir4 overexpression. Insertion

of the ADH1p promoter upstream of SIR3 leads to mild Sir3 overexpression. Error bars indicate survival standard error (SEM) of at least three independent experiments.

C. Representative images of two hybrid assays testing the interaction between the full-length Sir3 and full-length Sae2 proteins in WT cells expressing or not high levels of Sir4 (oeSir4 and WT respectively).

D. Representative images of Sae2-GFP in WT cells and in cells overexpressing either full-length Sir3 or the sir3SaID domain. Scale bars are 2  $\mu\text{m}$ .

E. Representative images of Mre11-GFP in WT cells and in cells overexpressing Sir3. Scale bars are 2  $\mu\text{m}$ .

## Supplementary data

**Table S1: *S. cerevisiae* strains used in this paper:**

| Strain  |     | Genotype                                                                                                                                                 | Source or reference | figure                 |
|---------|-----|----------------------------------------------------------------------------------------------------------------------------------------------------------|---------------------|------------------------|
| yKD513  | (1) | TELVI-R::lox-ura3-ISceI ura3-1Δ::KanMx                                                                                                                   | This study          | 1B                     |
| yKD788  | (1) | TELVI-R::lox-ura3-ISceI ura3-1Δ::KanMx dnl4Δ::HIS3Mx                                                                                                     | Batté et al. 2107   | 1B                     |
| yKD790  | (1) | TELVI-R::lox-ura3-ISceI ura3-1Δ::KanMx sir3::Nat-GPDp-SIR3                                                                                               | This study          | 1B, 2C                 |
| yKD800  | (1) | TELVI-R::lox-ura3-ISceI ura3-1Δ::KanMx dnl4Δ::HIS3Mx sir3::Nat-GPDp-SIR3                                                                                 | Batté et al. 2107   | 1B                     |
| yKD1891 | (1) | TELVI-R::lox-ura3-ISceI ura3-1Δ::KanMx sir3::Nat-GPDp-SIR3 sir4Δ::HIS3Mx                                                                                 | This study          | 1B                     |
| yKD1472 | (1) | TELVI-R::lox-ura3-ISceI ura3-1Δ::KanMx sae2Δ::HIS3Mx                                                                                                     | This study          | 1B                     |
| yKD1561 | (1) | TELVI-R::lox-ura3-ISceI ura3-1Δ::KanMx sae2Δ::HIS3Mx sir3::Nat-GPDp-SIR3                                                                                 | This study          | 1B                     |
| yKD516  | (1) | lys2::lox-ura3-ISceI ura3-1Δ::KanMx                                                                                                                      | This study          | 1C, 1E, 1H, 5A, 5B, 6A |
| yKD789  | (1) | lys2::lox-ura3-ISceI ura3-1Δ::KanMx dnl4Δ::HIS3Mx                                                                                                        | Batté et al. 2107   | 1C                     |
| yKD706  | (1) | lys2::lox-ura3-ISceI ura3-1Δ::KanMx sir3::Nat-GPDp-SIR3                                                                                                  | This study          | 1C, 1E, 1H, 5B         |
| yKD802  | (1) | lys2::lox-ura3-ISceI ura3-1Δ::KanMx dnl4Δ::HIS3Mx sir3::Nat-GPDp-SIR3                                                                                    | Batté et al. 2107   | 1C                     |
| yKD1562 | (1) | lys2::lox-ura3-ISceI ura3-1Δ::KanMx dnl4Δ::HIS3Mx sir3::Nat-GPDp-SIR3 sae2Δ::HIS3Mx                                                                      | This study          | 1C, 1E, 1H             |
| yKD1474 | (1) | lys2::lox-ura3-ISceI ura3-1Δ::KanMx sae2Δ::HIS3Mx                                                                                                        | This study          | 1C, 1E, 1H, 5A, 5B, 6A |
| yKD1656 | (1) | lys2::lox-ura3-ISceI ura3-1Δ::KanMx mre11-H125N                                                                                                          | This study          | 1C                     |
| yKD2274 | (1) | lys2::lox-ura3-ISceI ura3-1Δ::KanMx mre11-H125N sae2Δ::Nat                                                                                               | This study          | 1C                     |
| yKD1880 |     | MATa RAD5 ADE2 hmlΔ::HPH trp1:: Gal1p-ISceI-TRP1 lys2::lox-ura3-ISceI ura3-1Δ::KanMx Mre11-YFP                                                           | This study          | 1F, 1G, 6E             |
| yKD1881 |     | MATa RAD5 ADE2 hmlΔ::HPH trp1:: Gal1p-ISceI-TRP1 lys2::lox-ura3-ISceI ura3-1Δ::KanMx Mre11-YFP sir3::Nat-GPDp-SIR3                                       | This study          | 1F, 1G, 6E             |
| yKD1841 |     | MATa RAD5 ADE2 hmlΔ::HPH trp1::GAL1p-ISceI-TRP1 lys2::lox-ura3-ISceI ura3-1Δ::KanMx Mre11-YFP sae2Δ::HIS3Mx                                              | This study          | 1G                     |
| yKD1843 |     | MATa RAD5 ADE2 hmlΔ::HPH trp1::GAL1p-ISceI-TRP1 lys2::lox-ura3-ISceI ura3-1Δ::KanMx Mre11-YFP sae2Δ::HIS3Mx sir3::Nat-GPDp-Sir3                          | This study          | 1G                     |
| yKD1620 | (1) | lys2::lox-ura3-ISceI ura3-1Δ::KanMx sir3::Nat-ADH1p-SIR3                                                                                                 | This study          | 1H                     |
| yKD1845 |     | MATalpha RAD5 ADE2 hmlΔ::oripRS hmrΔ::ampR trp1::GAL1p-ISceI-TRP1 TELVI-R::lox-ura3-ISceI ura3-1Δ::KanMx SAE2-GFP-spHIS5 sir3::SIR3-mCherry-HPH          | This study          | 2A                     |
| yKD1864 |     | MATalpha RAD5 ADE2 hmlΔ::oripRS hmrΔ::ampR trp1::GAL1p-ISceI-TRP1 TELVI-R::lox-ura3-ISceI ura3-1Δ::KanMx SAE2-GFP-spHIS5 sir3::Nat-GPDp-SIR3-mCherry-HPH | This study          | 2A, 5C                 |
| yKD1664 |     | MATalpha RAD5 ADE2 hmlΔ::oripRS hmrΔ::ampR trp1:: GAL1p-ISceI-TRP1 TELVI-R::lox-ura3-ISceI ura3-1Δ::KanMX                                                | This study          | 2B, 2C, 2D, 5E         |
| yKD1680 |     | MATalpha RAD5 ADE2 hmlΔ::oripRS hmrΔ::ampR trp1::GAL1p-ISceI-TRP1 TELVI-R::lox-ura3-ISceI ura3-1Δ::KanMx SAE2-GFP-spHIS5                                 | This study          | 2B, 2D, 5E, 6D         |

|         |     |                                                                                                                                                                                              |                   |                   |
|---------|-----|----------------------------------------------------------------------------------------------------------------------------------------------------------------------------------------------|-------------------|-------------------|
| yKD1712 |     | MATalpha RAD5 ADE2 hmlΔ::oripRS hmrΔ::ampR trp1::GAL1p-ISceI-TRP1 TELVI-R::lox-ura3-ISceI ura3-1Δ::KanMx SAE2-GFP-spHIS5 sir3::Nat-GPDp-SIR3                                                 | This study        | 2B, 2C, 5E, 6D    |
| yKD1778 |     | MATalpha RAD5 ADE2 hmlΔ::oripRS hmrΔ::ampR trp1::GAL1p-ISceI-TRP1 TELVI-R::lox-ura3-ISceI ura3-1Δ::KanMx SAE2-GFP-spHIS5 sir3Δ::Nat                                                          | This study        | 2B, 2D, 5E        |
| Y190    |     | MATa his3-Δ200 ade2-101 trp1-901 leu2-3,112 cyh2 gal4Δ gal80Δ ura3-52::URA3::GAL1 <sub>UAS</sub> -GAL1 <sub>TATA</sub> -lacZ lys2-801::LYS2::GAL4 <sub>UAS</sub> -HIS3 <sub>TATA</sub> -HIS3 | Harper et al 1993 | 3B,3C, 3D, 4C, 6C |
| yKD1882 |     | Y190 sir4Δ::Nat                                                                                                                                                                              | This study        | 3D                |
| yKD1991 |     | his3-Δ200 ade2-101 trp1-901 leu2-3,112 cyh2 gal4Δ gal80Δ URA3::lexAop-lacZ LYS2::GAL1 <sub>UAS</sub> -HIS3 <sub>TATA</sub> -HIS3                                                             | This study        | 4B                |
| yKD2157 | (1) | lys2::lox-ura3-ISceI ura3-1Δ::KanMx sir3::Nat-GPDp-sir3 <sup>SaiD</sup>                                                                                                                      | This study        | 5A                |
| yKD2158 | (1) | lys2::lox-ura3-ISceI ura3-1Δ::KanMx sir3::Nat-GPDp-sir3 <sup>SaiD</sup> sae2Δ::HIS3Mx                                                                                                        | This study        | 5A                |
| yKD2161 | (1) | lys2::lox-ura3-ISceI ura3-1Δ::KanMx sir3::Nat-GPDp-sir3 <sup>SaiD-T557I</sup>                                                                                                                | This study        | 5A                |
| yKD2162 | (1) | lys2::lox-ura3-ISceI ura3-1Δ::KanMx sir3::Nat-GPDp-sir3 <sup>SaiD-T557I</sup> sae2Δ::HIS3Mx                                                                                                  | This study        | 5A                |
| yKD2192 | (1) | lys2::lox-ura3-ISceI ura3-1Δ::KanMx sir3::Nat-GPDp-sir3-T557I                                                                                                                                | This study        | 5B                |
| yKD2194 | (1) | lys2::lox-ura3-ISceI ura3-1Δ::KanMx sir3::Nat-GPDp-sir3-T557I sae2Δ::HIS3Mx                                                                                                                  | This study        | 5B                |
| yKD2287 |     | MATalpha RAD5 ADE2 hmlΔ::oripRS hmrΔ::ampR trp1::GAL1p-ISceI-TRP1 TELVI-R::lox-ura3-ISceI ura3-1Δ::KanMx SAE2-GFP-spHIS5 sir3::Nat-GPDp-sir3-T557I-mCherry-HPH                               | This study        | 5C                |
| yKD1932 | (2) | adh4::URA3-TEL7L                                                                                                                                                                             | This study        | 5D                |
| yKD1934 | (2) | adh4::URA3-TEL7L sir4Δ::Nat                                                                                                                                                                  | This study        | 5D                |
| yKD2181 | (2) | adh4::URA3-TEL7L sir3::Nat-GPDp-SIR3                                                                                                                                                         | This study        | 5D                |
| yKD2254 | (2) | adh4::URA3-TEL7L sir3::Nat-GPDp-sir3-T557I                                                                                                                                                   | This study        | 5D                |
| yKD2242 | (2) | adh4::URA3-TEL7L sir3-T557I                                                                                                                                                                  | This study        | 5D                |
| yKD2286 |     | MATalpha RAD5 ADE2 hmlΔ::oripRS hmrΔ::ampR trp1::GAL1p-ISceI-TRP1 TELVI-R::lox-ura3-ISceI ura3-1Δ::KanMx SAE2-GFP-spHIS5 sir3::Nat-GPDp-sir3-T557I                                           | This study        | 5E                |
| yKD1467 | (1) | lys2::lox-ura3-ISceI ura3-1Δ::KanMx sir3Δ::HIS3MX                                                                                                                                            | This study        | 6A                |
| yKD1892 | (1) | lys2::lox-ura3-ISceI ura3-1Δ::KanMx sir4Δ::HIS3Mx                                                                                                                                            | This study        | 6A                |
| yKD1936 | (1) | lys2::lox-ura3-ISceI ura3-1Δ::KanMx sir3Δ::Nat sir4Δ::HIS3Mx                                                                                                                                 | This study        | 6A                |
| yKD1969 | (1) | lys2::lox-ura3-ISceI ura3-1Δ::KanMx sir4Δ::HIS3Mx sae2Δ::Nat                                                                                                                                 | This study        | 6A                |
| yKD2265 | (1) | lys2::lox-ura3-ISceI ura3-1Δ::KanMx sir3-T557I                                                                                                                                               | This study        | 6A                |
| yKD2278 | (1) | lys2::lox-ura3-ISceI ura3-1Δ::KanMx sir3-T557I sir4Δ::Nat                                                                                                                                    | This study        | 6A                |
| yKD2038 | (1) | lys2::lox-ura3-ISceI ura3-1Δ::KanMx his3::HIS3-TEFp                                                                                                                                          | This study        | 6B                |
| yKD2039 | (1) | lys2::lox-ura3-ISceI ura3-1Δ::KanMx his3::HIS3-TEFp-SIR4                                                                                                                                     | This study        | 6B                |
| yKD2054 | (1) | lys2::lox-ura3-ISceI ura3-1Δ::KanMx sir3::Nat-ADH1p-SIR3 his3::HIS3-TEFp                                                                                                                     | This study        | 6B                |
| yKD2055 | (1) | lys2::lox-ura3-ISceI ura3-1Δ::KanMx sir3::Nat-ADH1p-SIR3 his3::HIS3-TEFp-SIR4                                                                                                                | This study        | 6B                |
| yKD2042 | (1) | lys2::lox-ura3-ISceI ura3-1Δ::KanMx sir3::Nat-ADH1p-SIR3 sae2Δ::Nat his3::HIS3-TEFp                                                                                                          | This study        | 6B                |
| yKD2043 | (1) | lys2::lox-ura3-ISceI ura3-1Δ::KanMx sir3::Nat-ADH1p-SIR3 sae2Δ::Nat his3::HIS3-TEFp-SIR4                                                                                                     | This study        | 6B                |
| yKD2133 | (1) | lys2::lox-ura3-ISceI ura3-1Δ::KanMx SAE2-GFP-spHIS5                                                                                                                                          | This study        | 6D                |
| yKD2139 | (1) | lys2::lox-ura3-ISceI ura3-1Δ::KanMx SAE2-GFP-spHIS5 sir3::Nat-GPDp-SIR3 <sup>SaiD</sup>                                                                                                      | This study        | 6D                |

- (1) All those strains are W303 *MATa RAD5+ ade2-1::ADE2 rap1::GFP-RAP1-LEU2 hml::HPH trp1::GAL1p-IScel-TRP1*
- (2) All those strains are W303 *Mata RAD5 ADE2 leu2-3,112 his3-11,15 trp1-1 ura3-1*

**Table S2: Primers used in this paper:**

| Gene           | Primer Name | Primer Sequence             |
|----------------|-------------|-----------------------------|
| OGG1_F         | pr776       | CAATGGTGTAGGCCCCAAAG        |
| OGG1_R         | pr777       | ACGATGCCATCCATGTGAAGT       |
| TEL6R_+0.2kb_F | pr750       | TGAGGCCATTTCCGTGTGTA        |
| TEL6R_+0.2kb_R | pr751       | CCCAGTCCTCATTTCATCAA        |
| TEL6R_+0.9kb_F | pr752       | TGATGAATTACAAGGGAACAATGAG   |
| TEL6R_+0.9kb_R | pr753       | CATCAAACAAGTAGGAATGCGAAA    |
| TEL6R_-0.9kb_F | pr981       | CTGAAAAAATGTACTGATTTCTTCTCG |
| TEL6R_-0.9kb_R | pr982       | CAACACCATACTCGAACTCATGTAA   |
| LYS2_0.9kb_F   | pr764       | TGATTTACCATTGGGCACAATTT     |
| LYS2_0.9kb_R   | pr765       | AATTTCCGCGCAAAGG            |
| IScelcs_F      | pr768       | GGAGTTAGTTGAAGCATTAGGTCCC   |
| IScelcs_R      | pr769       | GCGGCTTAACTGTGCCCTC         |

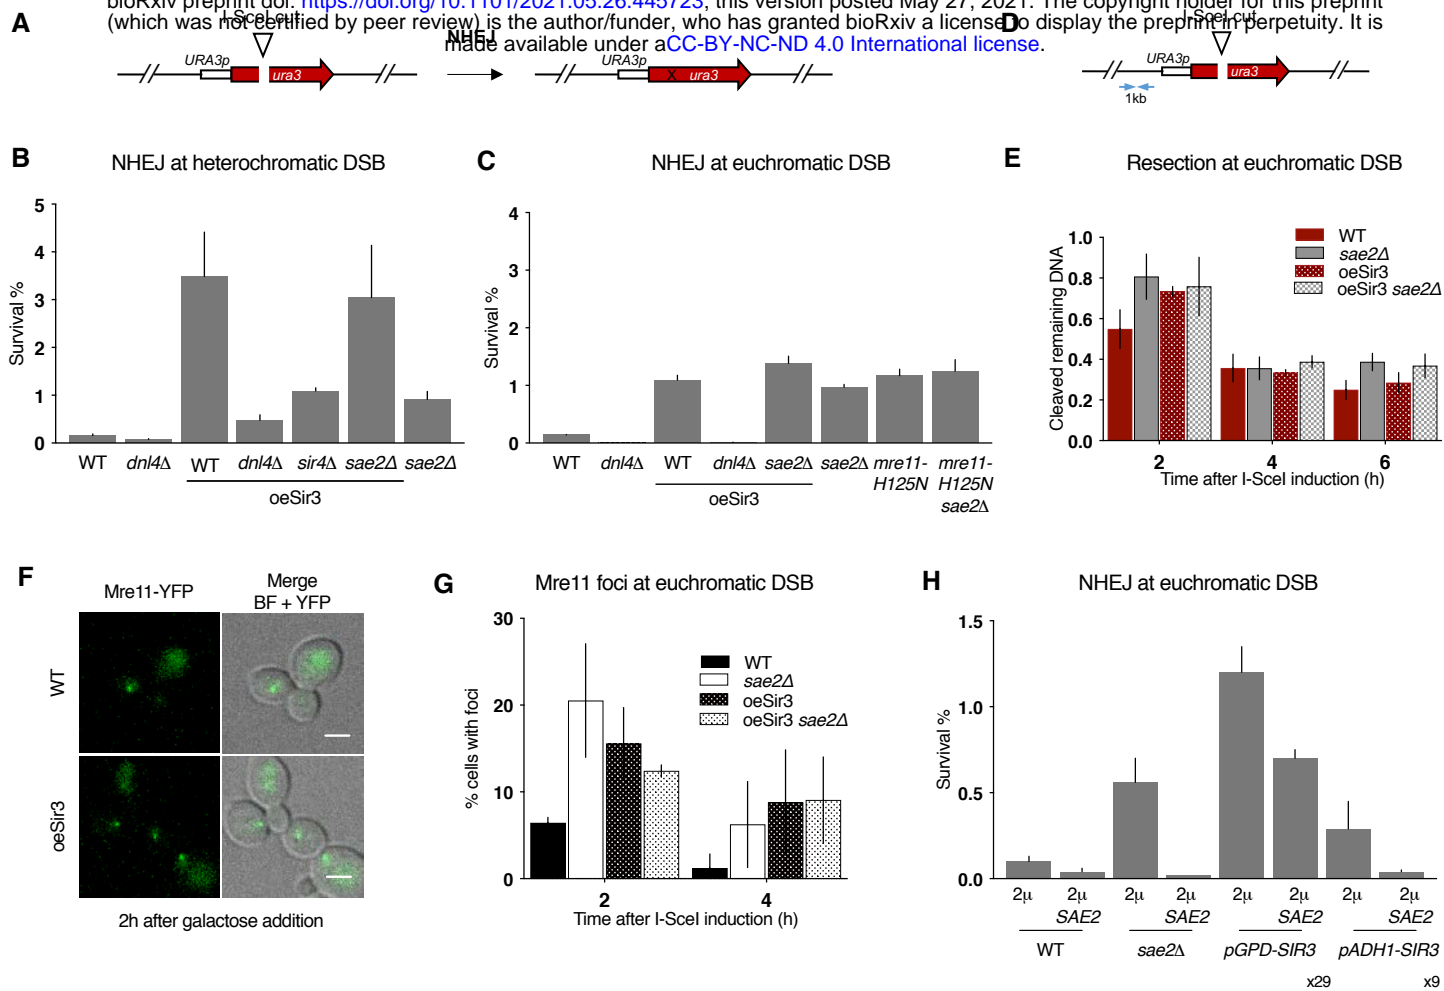

**Figure 1 : Sir3 overexpression inhibits Sae2 and increases error-prone NHEJ**

A. Schematic representation of the assay used to estimate error-prone NHEJ at euchromatic DSB.

B. Survival frequencies observed after DSB induction at TEL6R in WT, *dnl4Δ*, *sir4Δ* cells, expressing or not high levels of Sir3p (oeSir3 and WT respectively). Error bars indicate survival standard error (SEM) of at least three independent experiments.

C. Survival frequencies observed after DSB induction at LYS2 in the indicated strains. Error bars indicate survival standard error (SEM) of at least three independent experiments.

D. Schematic representation of the LYS2 locus with primers located at 1 kb from the I-SceI site for the DNA measurements (blue arrows).

E. DNA levels measured at 1 kb from the I-SceI cut site at LYS2 over time by qPCR in WT and *sae2Δ* cells expressing or not high levels of Sir3p (oeSir3 and WT respectively). DNA levels were normalized to DNA levels at the OGG1 locus and corrected for differences in DSB cleavage efficiency (see Materials and Methods for details). Error bars represent the standard deviation (SD) of three independent experiments.

F. Representative images of Mre11-YFP foci in response to an I-SceI-induced DSB at LYS2 in WT cells, expressing or not high levels of Sir3p (oeSir3 and WT respectively). Scale bars are 2 μm.

G. Quantification of cells with DSB induced Mre11-YFP foci after DSB induction at LYS2 I-SceI cleavage site in WT, *sae2Δ* and Sir3 overexpressing (oeSir3) strains. Error bars indicate survival standard error (SEM) of at least three independent experiments.

H. Survival frequencies after DSB induction at LYS2 locus, in strains where SIR3 is expressed from its native, pADH1 or pGPD promoters respectively and in which SAE2 is expressed or not from a high copy number 2μ plasmid. Fold increase in Sir3 protein by pADH1 or pGPD (Hoche et al 2018) is indicated. Error bars indicate survival standard error (SEM) of at least three independent experiments.

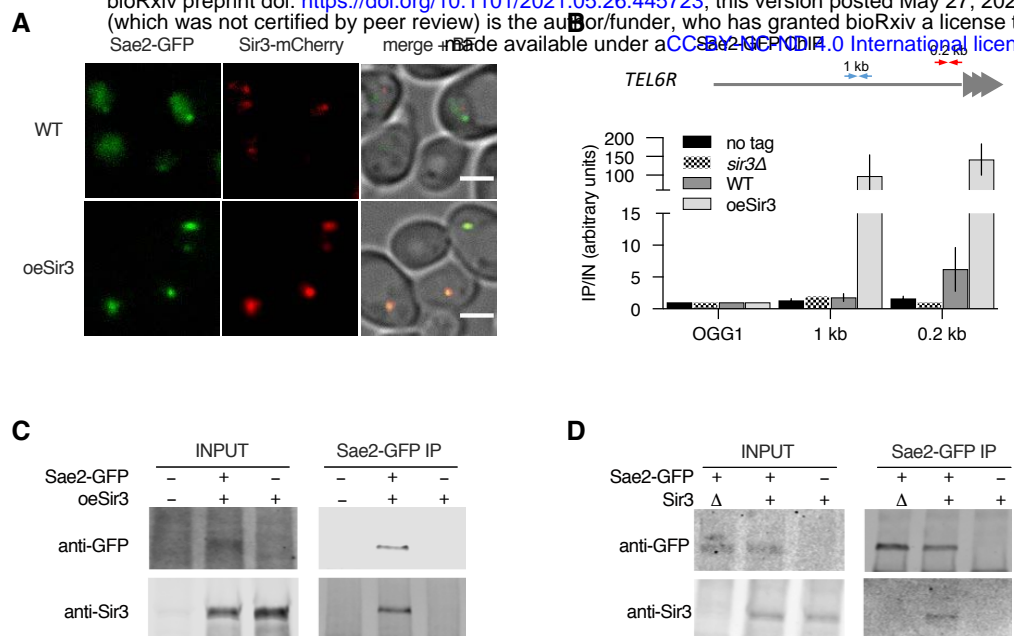

**Figure 2 : Sir3 and Sae2 physically interact**

A. Representative images of Sir3-mCherry and Sae2-GFP signal in WT and SIR3 overexpressing cells. Scale bars are 2 μm.

B. Sir3-binding at TEL6R in untagged, WT, *sir3Δ* cells or in cells overexpressing Sir3 (oeSir3). Binding is probed by ChIP-qPCR 0.2 (red arrows) and 1kb (blue arrows) from telomeres using antibodies against Sae2-GFP. The mean of three independent biological replicates is shown and error bars correspond to the variation between replicates.

C. Co-immunoprecipitation between Sir3 and Sae2-GFP from cells overexpressing Sir3, analysed by Western blot with anti-GFP and anti-Sir3 antibodies.

D. Co-immunoprecipitation between Sir3 and Sae2-GFP from WT cells using antibodies against Sae2-GFP, analysed by Western blot.



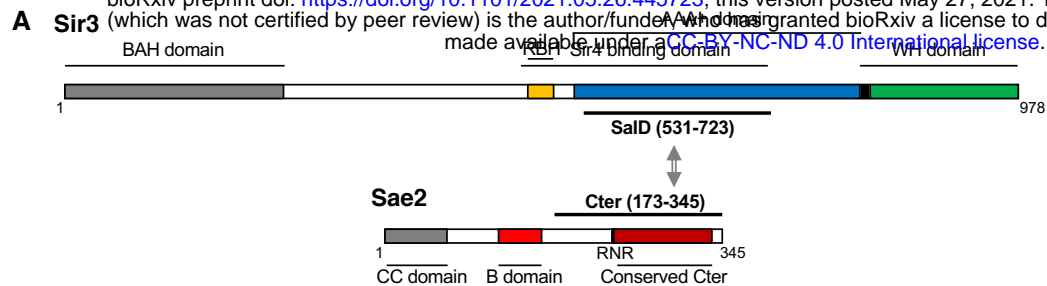

**B** Two-hybrid

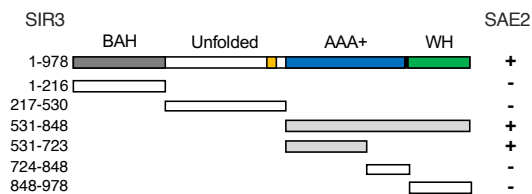

**C** Two-hybrid

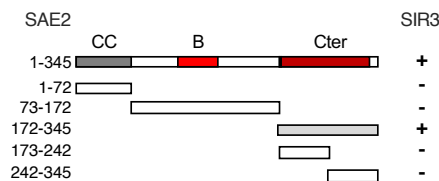

**D**

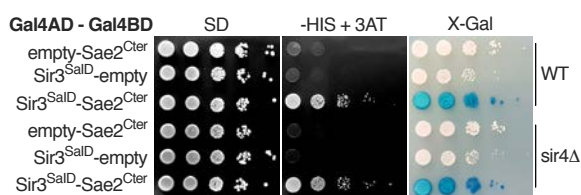

**E**

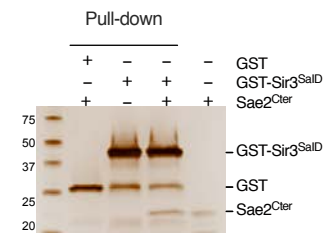

**Figure 3 : Direct physical interaction between Sir3<sup>SalD</sup> and Sae2<sup>C</sup> domains**

A. Schematic representation of Sir3 and Sae2 protein domains.

B. Delineation of the Sir3 domain responsible for interaction with Sae2 by two-hybrid assays. The GAL4-BD fusions with indicated Sir3 fragments were tested in combination with a GAL4-AD-Sae2 fusion; “+” indicates an interaction.

C. Delineation of the Sae2 domain responsible for interaction with Sir3 by two-hybrid assays. The GAL4-BD fusions with indicated Sae2 fragments were tested in combination with a GAL4-AD-Sir3 fusion; “+” indicates an interaction.

D. Yeast two-hybrid interaction analysis between Sae2<sup>C</sup> and Sir3<sup>SalD</sup> domains in WT or sir4Δ cells. Growth on -His + 3AT and blue coloration on X-gal indicate an interaction.

E. Representative silver-stained gels of in vitro GST-pulldown of GST or GST-Sir3<sup>SalD</sup> and Sae2<sup>C</sup> purified peptides. Control: Sae2<sup>C</sup> (300 ng, lane 4).

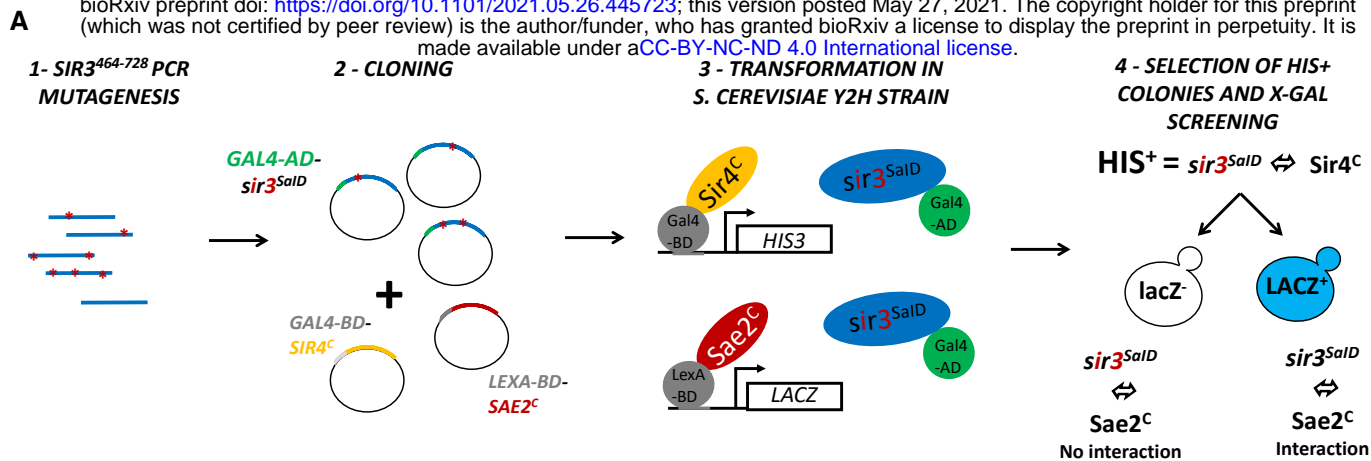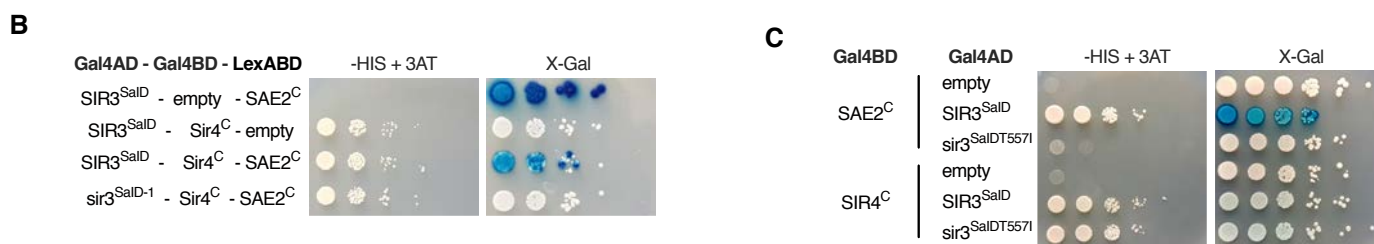

**Figure 4 : The T5571 point mutation in Sir3 abolishes Sae2-Sir3 interaction**

A. Schematic representation of the assay used to screen for SIR3 mutants deficient for Sae2 interaction while maintaining interaction with Sir4. The SIR3<sup>SalD</sup> fragment (464-728) was mutagenized by PCR, cloned in the pACT2 two hybrid plasmid and transformed into the reporter strain along with plasmids expressing LexA-BD-SAE2<sup>C</sup> and GAL4-BD-SIR4<sup>C</sup> fusion proteins. The reporter strain (yKD1991) bears a Gal4 binding sequence (Gal4BD) upstream of a HIS3 reporter gene, and a LexA binding sequence (LexABD) precedes a LacZ reporter gene. Transformants in which GAL4-BD-SIR4<sup>C</sup> interacts with SIR3<sup>SalD</sup>-GAL4-AD fragment were selected for HIS3 expression on -HIS + 3AT medium and subsequently screened for LacZ expression upon X-gal coloration. Cells showing no LacZ expression were collected and the mutated *sir3*<sup>SalD</sup>-GAL4-AD was retrieved and sequenced.

B. Representative images of two hybrid assays in the yKD1991 strain testing the interaction of the WT or the mutant SIR3<sup>SalD</sup> fragment isolated from the screen with SAE2<sup>C</sup> or SIR4<sup>C</sup>.

C. Representative images of two hybrid assays testing the interaction of the WT or the mutant SIR3<sup>SalDT5571</sup> fragment with SAE2<sup>C</sup> or SIR4<sup>C</sup>.

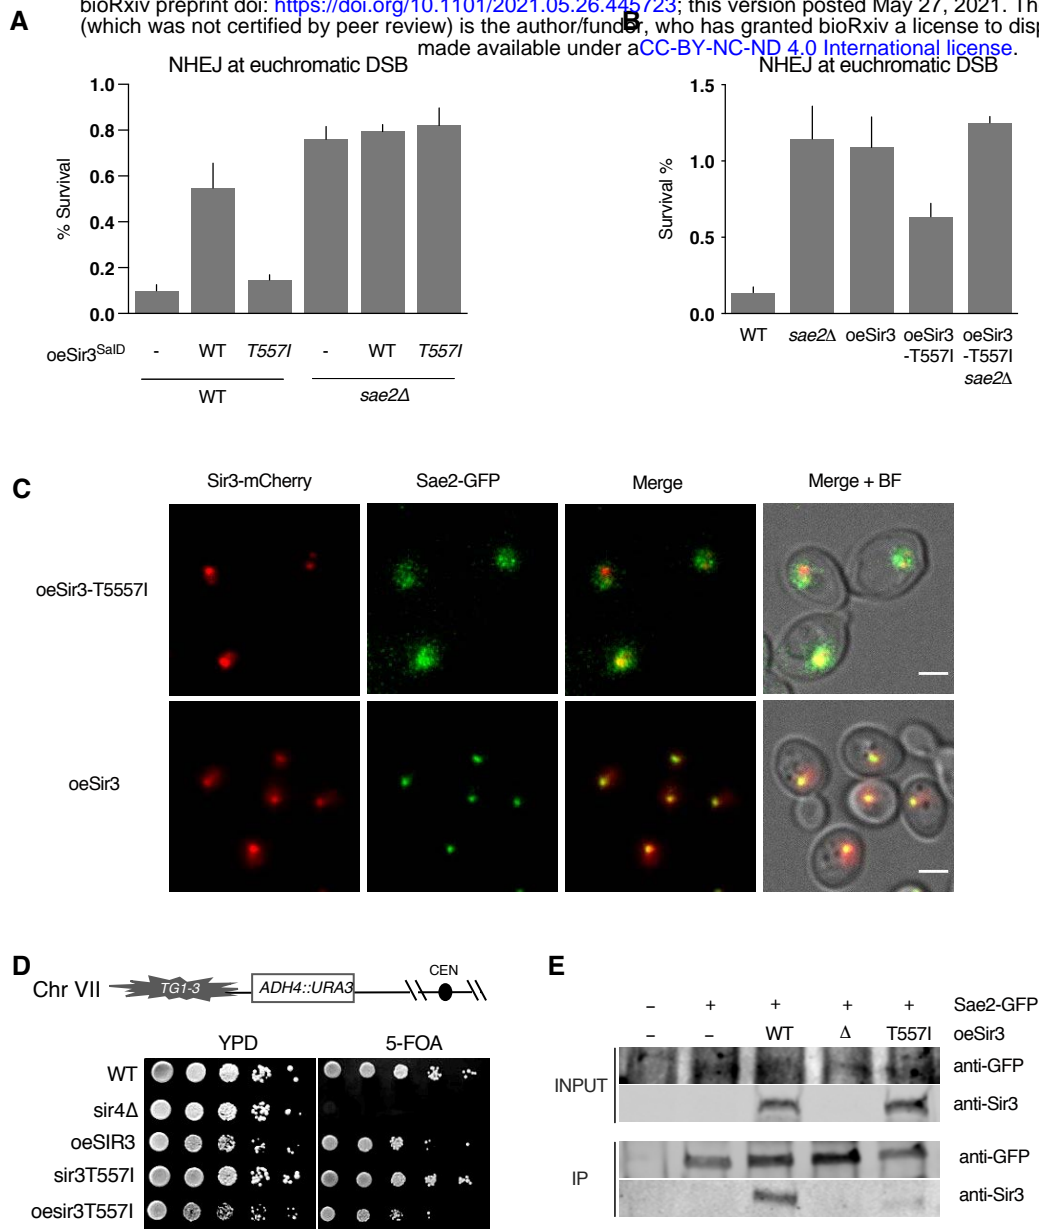

**Figure 5: Sir3-Sae2 interaction prevents Sae2 function and promotes NHEJ**

A. Survival frequencies after DSB induction at *LYS2* locus in WT or *sae2Δ* strains where the Sir3<sup>SalD</sup> or Sir3<sup>SalDT5571</sup> domains are overexpressed from a GPD promoter at the *SIR3* locus. Error bars indicate survival standard error (SEM) of at least three independent experiments.

B. Survival frequencies after DSB induction at *LYS2* locus in the indicated strains. Error bars indicate survival standard error (SEM) of at least three independent experiments.

C. Representative images of Sir3-mCherry and Sae2-GFP signal in cells overexpressing Sir3 and sir3T5571. Scale bars are 2  $\mu$ m.

D. Telomeric silencing assay at *TEL7L* in WT, *sir4Δ*, *sir3T5571* cells, cells overexpressing *SIR3* (*oeSIR3*) or *sir3T5571* (*oesir3T5571*). Growth on 5-FOA plates reflects telomeric silencing.

E. Co-immunoprecipitation between Sae2-GFP and Sir3 from untagged, Sae2-GFP WT cells, and Sae2-GFP cells overexpressing WT Sir3 (*oeSir3*, WT), Sae2-GFP *sir3Δ* or Sae2-GFP overexpressing the *sir3-T5571* mutant (*oeSir3*, T5571) using antibodies against Sae2-GFP, analysed by Western blot with anti-GFP and anti-Sir3 antibodies.

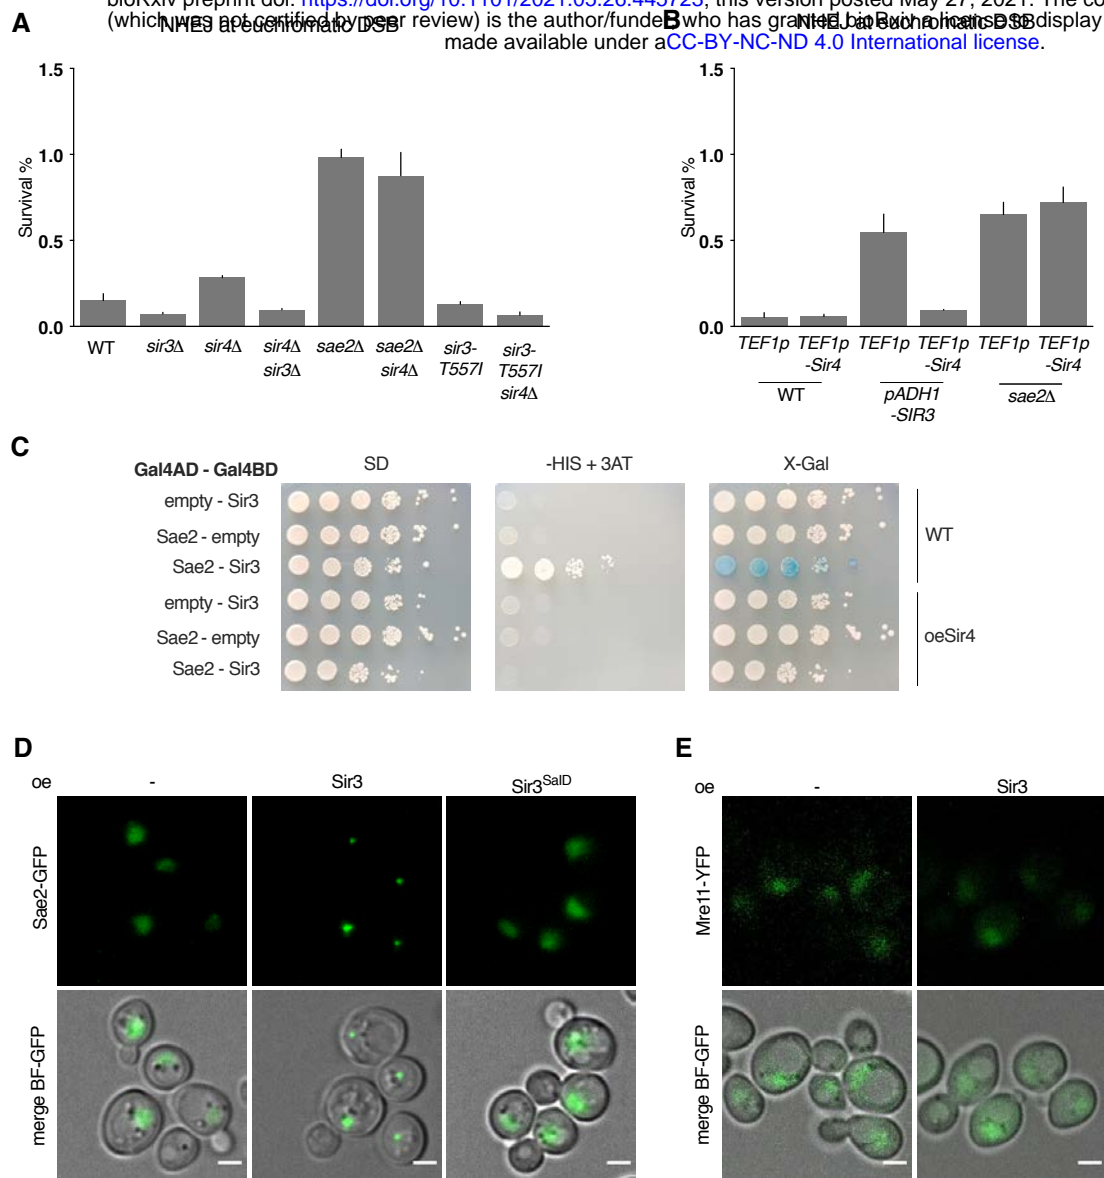

**Figure 6: Sir3-Sae2 interaction is modulated by Sir4 and impairs Sae2-MRX interaction.**

A. Survival frequencies after DSB induction at *LYS2* locus in the indicated strains. Error bars indicate survival standard error (SEM) of at least three independent experiments.

B. Survival frequencies after DSB induction at *LYS2* locus in the indicated strains. Insertion of the strong *TEF1p* promoter upstream of the *SIR4* ORF leads to Sir4 overexpression. Insertion of the *ADH1p* promoter upstream of *SIR3* leads to mild Sir3 overexpression. Error bars indicate survival standard error (SEM) of at least three independent experiments.

C. Representative images of two hybrid assays testing the interaction between the full-length Sir3 and full-length Sae2 proteins in WT cells expressing or not high levels of Sir4 (oeSir4 and WT respectively).

D. Representative images of Sae2-GFP in WT cells and in cells overexpressing either full-length Sir3 or the *sir3SalD* domain. Scale bars are 2  $\mu$ m.

E. Representative images of Mre11-GFP in WT cells and in cells overexpressing Sir3. Scale bars are 2  $\mu$ m.

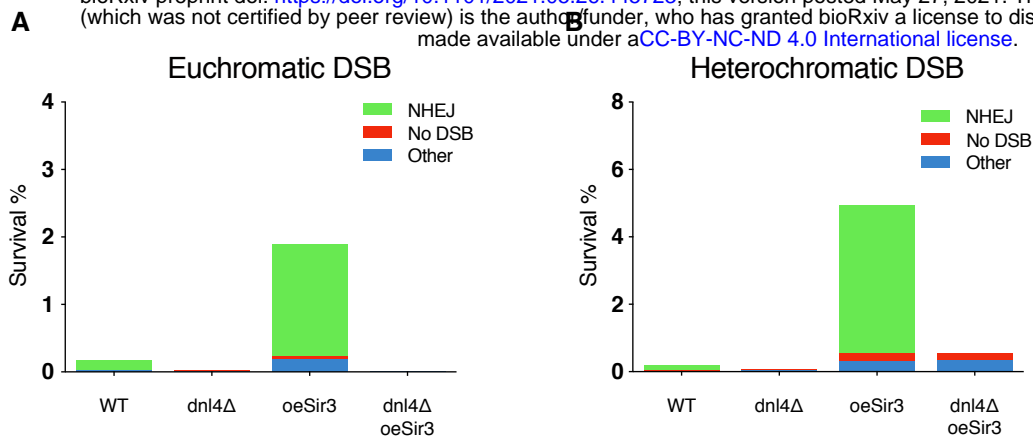

**Supplementary data 1:**

A. Survival frequencies and characterisation of the repair events after induction of a DSB at LYS2 in absence of recombination substrate.

B. Survival frequencies and characterisation of the repair events after induction of a DSB at TEL6R in absence of recombination substrate.

NHEJ stands for error-prone end joining events detected by a PCR product that cannot be cleaved *in vitro* by I-SceI. No DSB corresponds to survivors giving a PCR product that can be cleaved by I-SceI *in vitro* showing that they failed to induce I-SceI. Other gathers survivors in which no PCR product was obtained suggesting that repair occurred through other mechanisms. PCR products corresponding to NHEJ events were sequenced and exhibit patterns typical of NHEJ repair (rejoining with 1 to 9 bp deletion between sequences showing no or limited homology).

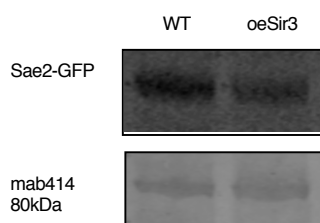

**Supplementary data 2:**

Western blot analysis with anti-GFP antibodies of whole cell protein extracts prepared from stationary phase cells. The 80kDa band detected by mab414 is used as a loading control.

**A**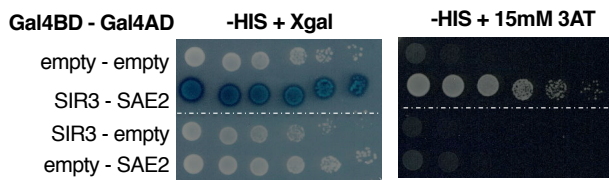**B**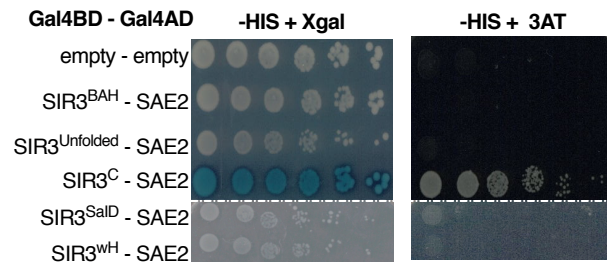**C**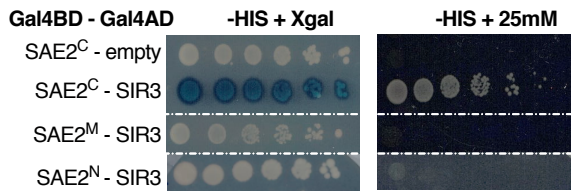**D**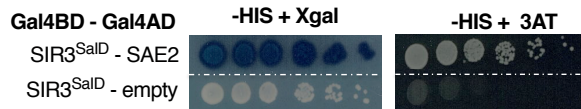**Supplementary data 3:**

Y2H screen analysis was performed in WT cells on -His + 3AT media and X gal coloration.

A. Representative image of two hybrid assays testing the interaction of the full length WT Sae2 and Sir3 proteins.

B. Representative image of two hybrid assays testing the interaction of full length Sae2 with Sir3 fragments. SIR3<sup>BAH</sup>= aa 1-216, SIR3<sup>unfolded</sup>= aa 217-530 SIR3<sup>C</sup>= aa 531-848, SIR3<sup>wH</sup>= aa 849-978 and SIR3<sup>SaID</sup>= 531-723.

C. Representative image of two hybrid assays testing the interaction of full length Sir3 with Sae2 fragments. SAE2<sup>C</sup>= aa 1-72 , SAE2<sup>M</sup>= aa 73-172 , SAE2<sup>N</sup>= aa 173-345.

D. Representative image of two hybrid assays testing the interaction of Sir3<sup>SaID</sup> and Sae2<sup>C</sup> with full length Sae2 and Sir3 respectively.

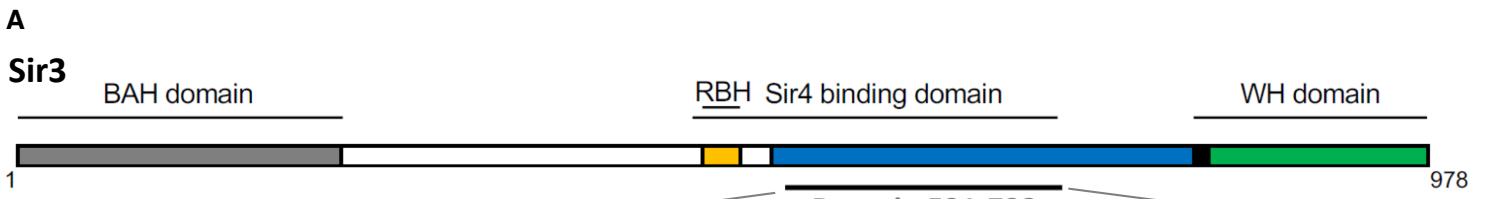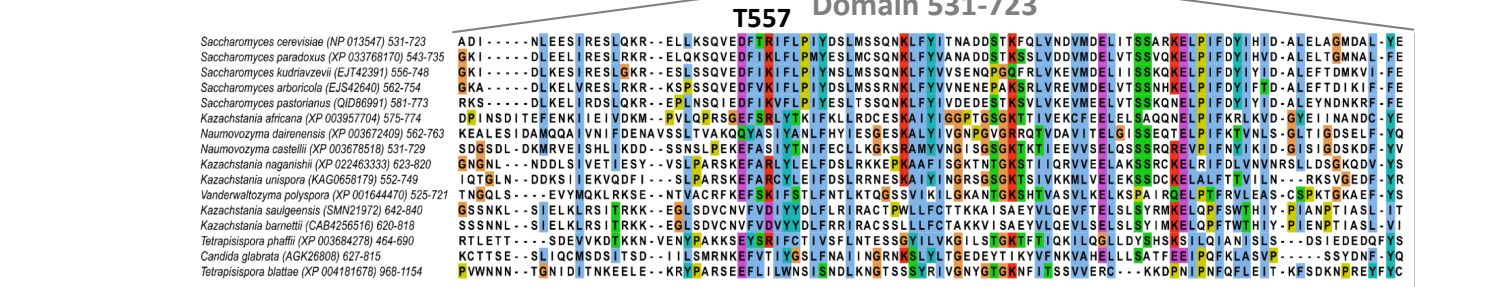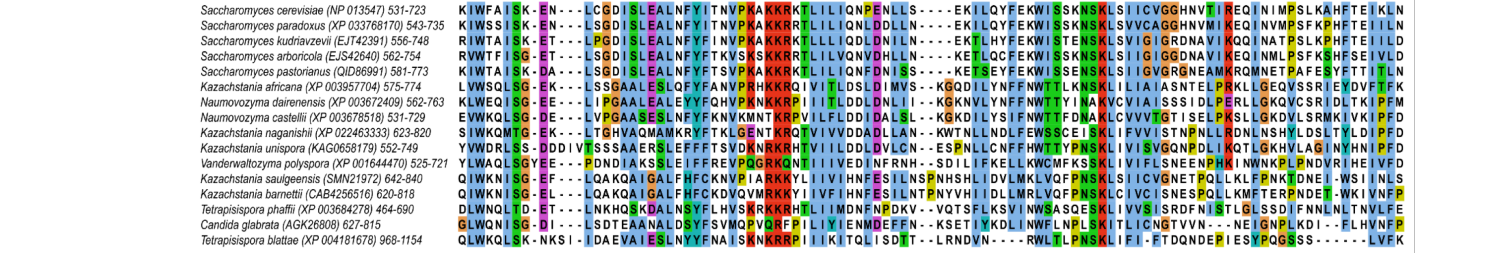

Xray structure  
Sir3 (529-844)  
PDB:3TE6

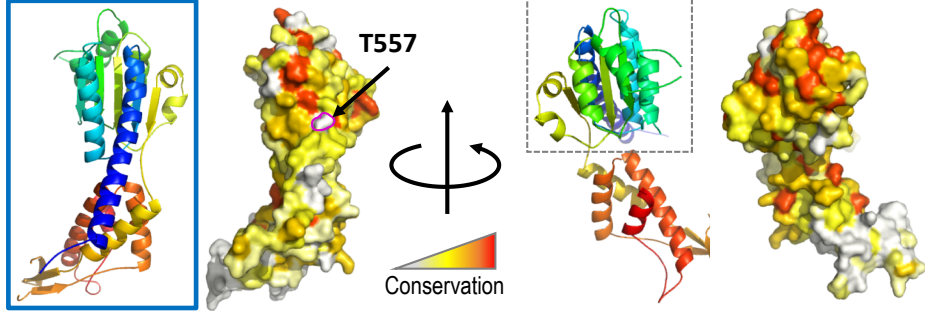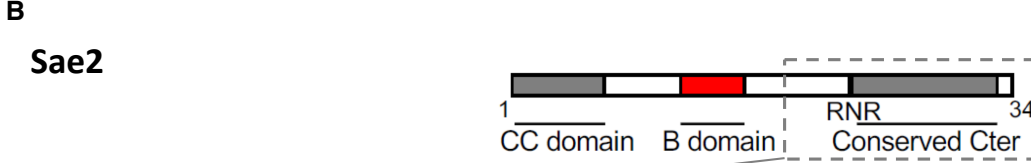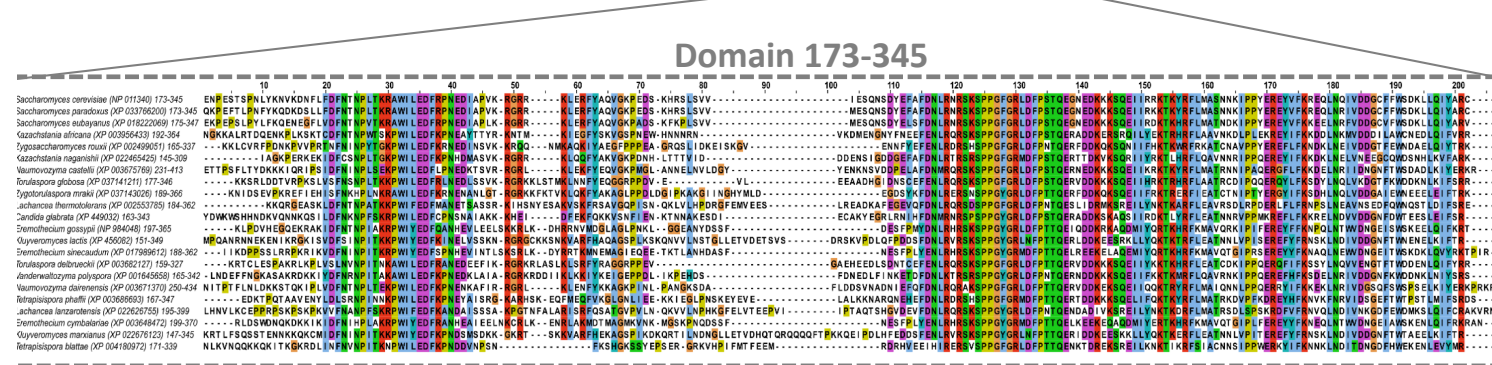

**Supplementary data 4:**

A. Multiple sequence alignment of the Sir3<sup>Sald</sup> domain of the *Saccharomycetaceae* family. NCBI RefSeq identifiers are given in parentheses. Below, ribbon representation of the Xray structure of the Sir3<sup>Sald</sup> domain (rainbow colors) and a surface projection of the conservation as calculated by the rate4site algorithm (Pupko et al, 2002) with a white-yellow-red color gradient highlighting most conserved region in red.

B. Multiple sequence alignment of the Sae2<sup>C</sup> domain of the *Saccharomycetaceae* family. NCBI RefSeq identifiers are given in parentheses.



**A****Sae2-173-345 purification**

Starting with 1l  
BL21 (DE3) transformed with  
pCDF-His-SUMO--ScSae2-173-345 (pKD435)

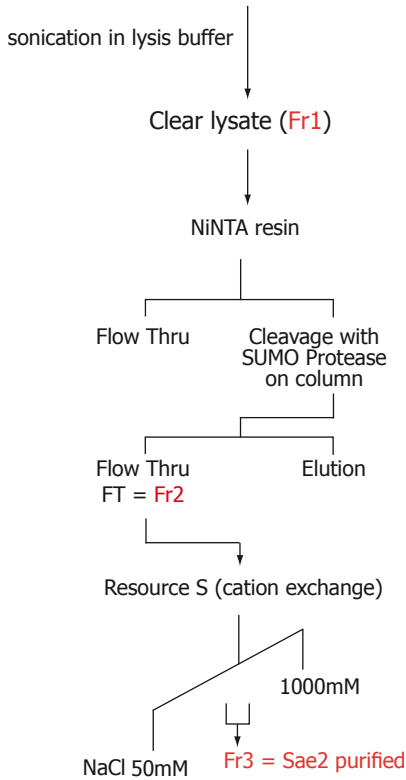**GST-Sir3-531-723 purification**

Starting with 1l  
BL21 (DE3) transformed with  
pnEAvG-ScSir3-531-723 (pKD434)

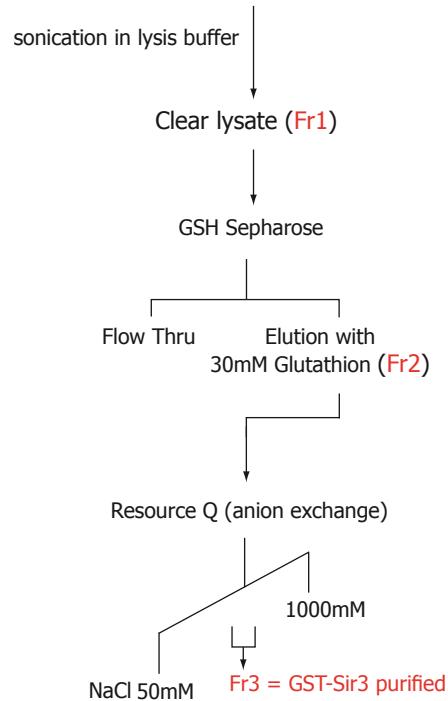**B**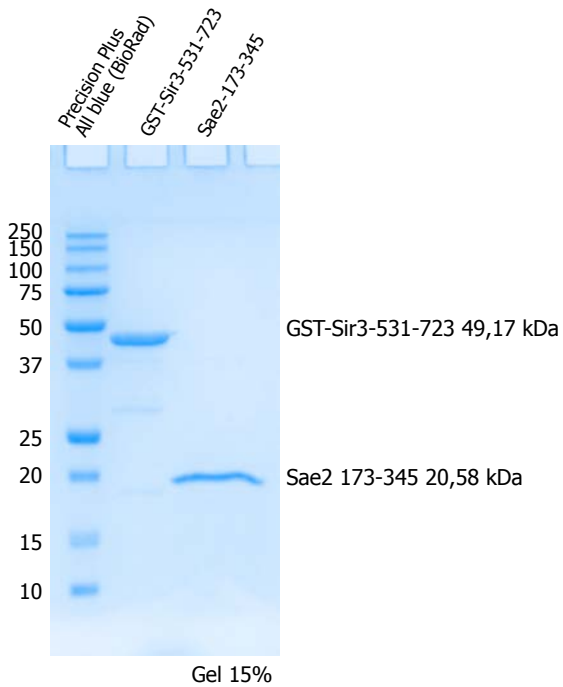**Supplementary data 5:**

A. Purification procedure

B. Coomassie blue staining of 4 µg of Sir3 and Sae purified from bacteria

**A**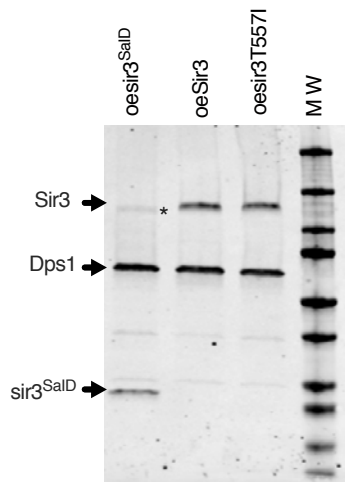**B**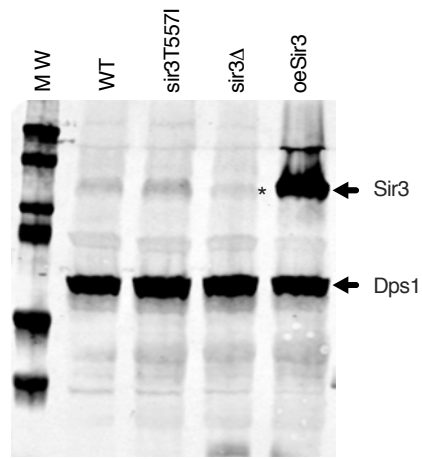**Supplementary data 6:**

A, B. Western blot analysis with Sir3 antibodies of protein extracts prepared from stationary phase cells of the indicated strains.

Dps1 is used as a loading control. \*Asterisk marks cross reacting Orc1 detected by Sir3 antibody.

**A**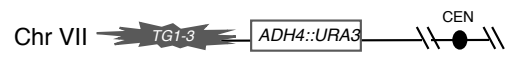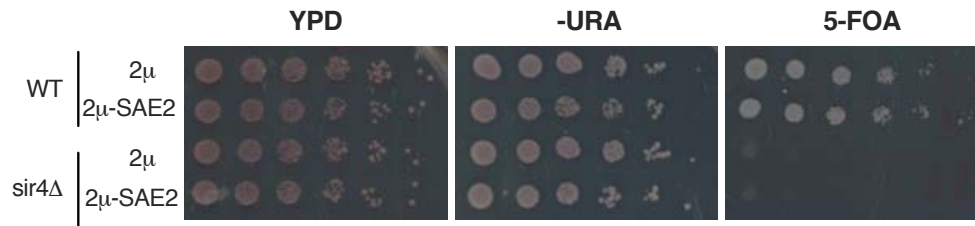**Supplementary data 7:**

A. Telomeric silencing assay at TEL7L in WT and sir4 $\Delta$  cells overexpressing SAE2 (2 $\mu$ -Sae2) or not (2 $\mu$ ). Increased growth on 5-FOA or decreased growth on -URA plates reflects an increase in telomeric silencing.

**A**

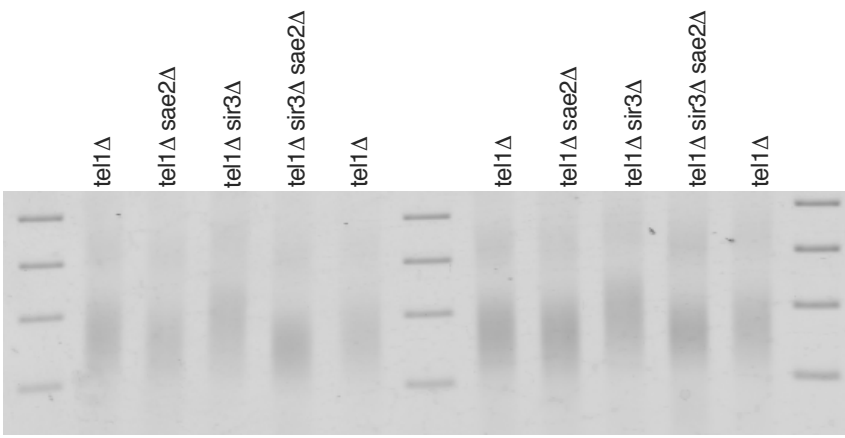

**Supplementary data 8:**

Telomere length was assessed by PCR after end-labeling with terminal transferase (Teixeira et al 2004)

A. Representative electrophoresis of telomere-PCR products of tel1Δ strains combined with the indicated null mutations.
